1 **Intensive Single Cell Analysis Reveals Immune Cell Diversity among Healthy Individuals**

2

3 Yukie Kashima<sup>1†</sup>, Keiya Kaneko<sup>1†</sup>, Patrick Reteng<sup>2†</sup>, Nina Yoshitake<sup>1</sup>, Lucky Ronald

4 Runtuwene<sup>3</sup>, Satoi Nagasawa<sup>1,4</sup>, Masaya Onishi<sup>1</sup>, Masahide Seki<sup>1</sup>, Ayako Suzuki<sup>1</sup>, Sumio

5 Sugano<sup>5,6</sup>, Mamiko Sakata-Yanagimoto<sup>7</sup>, Yumiko Imai<sup>8</sup>, Kaori Nakayama-Hosoya<sup>3</sup>, Ai

6 Kawana-Tachikawa<sup>3</sup>, Taketoshi Mizutani<sup>1</sup>, Yutaka Suzuki<sup>1\*</sup>

7

8 1, Department of Computational Biology and Medical Sciences, Graduate School of Frontier

9 Sciences, The University of Tokyo, Kashiwa, Chiba, Japan

10 2, Division of Collaboration and Education, International Institute for Zoonosis Control,

11 Hokkaido University, Sapporo, Hokkaido, Japan

12 3, AIDS Research Center, National Institute of Infectious Disease, Tokyo, Japan.

13 4, Division of Breast and Endocrine Surgery, Department of Surgery, St. Marianna University

14 School of Medicine, Kawasaki, Kanagawa, Japan

15 5, Institute of Kashiwa-no-ha Omics Gate, Kashiwa, Chiba, Japan

16 6, Future Medicine Education and Research Organization at Chiba University

17 Inohana 1-8-1 Chuo, Chiba-city, Chiba, 260-8670 Japan

18 7, Department of Hematology, Faculty of Medicine, University of Tsukuba, Tsukuba, Ibaraki,

19 Japan

20 8, Laboratory of Regulation for Intractable Infectious Diseases, National Institutes of

21 Biomedical Innovation, Health and Nutrition (NIBIOHN), Osaka 567-0085, Japan

22 † These authors equally contributed

23

## 24 **Contact information**

25 \*Correspondence should be addressed to:

26 Yutaka Suzuki

27 Laboratory of Functional Genomics, Department of Computational Biology and Medical

28 Sciences, Graduate School of Frontier Sciences, The University of Tokyo, 5-1-5, Kashiwanoha,

29 Kashiwa, Chiba 277-8562, JAPAN

30 E-mail: [ysuzuki@hgc.jp](mailto:ysuzuki@hgc.jp)

31 Tel/Fax: +81 4 7136 4076

32

## 33 **Manucript type**

34 Resource

35 **ABSTRACT**

36 It is believed that immune responses are different between individuals and at different times. In  
37 addition, personal health histories and unique environmental conditions should collectively  
38 determine the present state of immune cells. However, the cellular and molecular system  
39 mechanisms underlying such heterogeneity remain largely elusive. In this study, we conducted a  
40 systematic time-lapse single-cell analysis, using 171 single-cell libraries and 30 mass cytometry  
41 datasets intensively for seven healthy individuals. We found substantial diversity in immune cell  
42 populations and their gene expression patterns between different individuals. These patterns  
43 showed daily fluctuations even within the same individual spending a usual life. Similar  
44 diversities were also observed for the T cell receptor and B cell receptor repertoires. Detailed  
45 immune cell profiles at healthy statuses should give an essential background information to  
46 understand their immune responses, when the individual is exposed to various environmental  
47 conditions. To demonstrate this idea, we conducted the similar analysis for the same individuals  
48 on the vaccination of Influenza and SARS-CoV-2, since the date and the dose of the antigens  
49 are well-defined in these cases. In fact, we found that the distinct responses to vaccines between  
50 individuals, although key responses are common. Single cell immune cell profile data should  
51 make fundamental data resource to understand variable immune responses, which are unique to  
52 each individual.

## 53 INTRODUCTION

54 The human immune system consists of ingenious immune cells. It is widely known that the  
55 immune cells are collectively responsible for the versatile immune responses of an individual by  
56 shaping the immune landscape. The immune landscape should differ between individuals with  
57 distinct medical history and lifestyles, depending on genetic backgrounds and geographic origins.  
58 However, the influences and consequences of how immune cells maintain the previous memory  
59 of immune responses in a healthy state and respond to stimulation in normal life are largely  
60 unknown. It is partly because current knowledge on immune responses has been accumulated  
61 from laboratory animal models or diseased individuals. Even among individuals with a healthy  
62 appearance, infections, which may be mostly asymptomatic, occur daily.

63         Diverse immune responses, whether mild or severe, primarily occur at the infection site.  
64 However, it is commonly accepted that the immune profile is represented, at least in part, by  
65 circulating white blood cells i.e., peripheral blood mononuclear cells (PBMCs). Among the  
66 various cell types in PBMCs, innate immune cells are the first basal responders to antigen  
67 exposure, followed by the adaptive immune system. More precisely, monocytes are the first  
68 responder to various immune stimulations, the classical monocytes being CD14<sup>+</sup> monocyte and  
69 the non-classical monotypes being CD16<sup>+</sup> monocytes. When monocytes are recruited to the site

70 of immune responses, they mature into macrophages or dendritic cells (DCs). DCs engulf antigens  
71 through phagocytosis and migrate to lymph nodes where they present the antigens to T cells, and  
72 an adaptive immune response is invoked. Natural killer (NK) cells are also recruited to secrete  
73 proteins that kill the infected cells and trigger the adaptive immune response (Nicholson 2016).

74           The adaptive immune responses depend on the specific recognition of an antigen by T  
75 cells or B cells at its recognized part called epitope (Minervina et al. 2019). In T cells, the VDJ  
76 segments of the T cell receptor (TCR), consisting of alpha and beta chains, are imperative to  
77 function properly. A set of VDJ segments unique to each cell determines the sequence of the  
78 antigen-binding site presented on the cell surface. Cells sharing the same VDJ sequence are said  
79 to have the same “clonotype.” Effector CD8<sup>+</sup> T cells, also known as cytotoxic CD8<sup>+</sup> T cells, are  
80 activated upon antigen exposure via class I MHC molecule and leads the target cells to death  
81 (Golubovskaya and Wu 2016). Similarly, B cell receptors (BCRs) are composed of  
82 immunoglobulin molecules presented on the outer cell membrane. In B cells, antigen specificity  
83 is determined by the heavy and light chains of the immunoglobulins (IgK and IgL). Once exposed  
84 to an antigen, naïve B cells differentiate into either memory B cells or plasmablasts, which  
85 differentiate into plasma cells to produce antibodies.

86           Conventionally, flow cytometry and fluorescence-activated cell sorting, or more  
87 recently bulk RNA-seq, have been the standard methods for monitoring the states of PBMCs and  
88 the immune systems they represent(Stubbington et al. 2017). However, substantial concerns have  
89 been raised about these methods. The main drawback is that, although these methods offer high-  
90 throughput and extensive gene detection, the obtained data would come from the cell mass in  
91 bulk; hence, the gene expression for a particular cell population is not represented separately.  
92 Also, it has been impossible to analyze the VDJ patterns, which are unique to individual cells,  
93 especially in association with the status of their expressing immune cells. Single-cell RNA-seq  
94 (scRNA-seq), a recently introduced method, enables a detailed observation at the single-cell  
95 level(Stubbington et al. 2017). With this single-cell analytical approach, cellular heterogeneity  
96 previously masked using bulk RNA-seq is now open to investigation to assess the response of a  
97 certain cell to an identified antigen.

98           Using scRNA-seq, recent studies have illustrated in great detail how the immune cells  
99 practically change their profiles in response to disease and infection. For example, immune  
100 responses to infection with Severe Acute Respiratory Syndrome Coronavirus (SARS-CoV)-2,  
101 which is a pressing global health issue, has been analyzed very fervently last year. A study on the  
102 PBMCs of patients with moderate to severe coronavirus 2019 (COVID-19) reported that the  
103 relative abundance of naïve and activated T cells, mucosal-associated invariant T cells (MAIT),

104 and monocyte-derived DCs decreased with disease severity, while T cells, plasma B cells,  
105 classical monocytes, and platelets increased (Zhang et al. 2020). Particularly, the timing and  
106 degree of induction of a subclass of T cells, called gamma delta T cells, appeared to be an  
107 important factor in determining the severity of the infections. Furthermore, it is noteworthy that  
108 all the cell populations except for the activated T cells were restored at convalescence.

109           In contrast to disease states, the extent to which immunity may differ amongst healthy  
110 individuals remains almost totally elusive, although fundamental information on which various  
111 immune responses occur should be available. Only a handful of studies have been reported. TCR-  
112 VDJ gene-targeting PCR analysis revealed that TCR repertoires of memory T cells are at least  
113 partially specific to individuals. In contrast, TCRs from naïve T cells showed no such  
114 individuality. The diverse immunological profiles, depending on individuals, may reflect their  
115 genetic background, infection history, and interactions with environments over a lifetime.  
116 However, how such diversity is acquired, maintained, and serves as a ground state for immune  
117 responses in generally healthy individuals remains almost totally unknown.

118           In this study, we describe our observations of the immune profile heterogeneity amongst  
119 healthy adults at the single-cell level, measured using scRNA-seq of the cellular transcriptomes  
120 and the VDJ repertoires. The profiles were further perturbed by vaccination against influenza and

121 SARS-CoV-2. The resulting observations should be explained by the distinct “personal  
122 immunological landscape” shaped by each individual throughout their life and their present  
123 infection state, although participants reported a good health state during the study period. The  
124 broad aim of this study is to help understand baseline diversity in control groups regularly used  
125 in immunological studies of disease.

126

## 127 **RESULTS**

### 128 *Generation and evaluation of the scRNA-seq data for healthy individuals*

129 To characterize the immunological landscape of seven healthy individuals (H1 to H7), their  
130 PBMCs were collected and used for the following analyses. The overall study design, schematic  
131 illustration of sample collection and processing are shown in Fig. 1A. Refer to the Material and  
132 Methods section for further details on the procedure. The personal information of the  
133 individuals is summarized in inset table (Fig. 1A, bottom, inset table).

134 A droplet-based scRNA-seq (Chromium of 10X Genomics) was performed for all  
135 samples. Particularly for H1 and H2, PBMCs were sampled at nine-time points over months  
136 (Fig. 1A; Table S1). On average, 240,207,958 reads were obtained for a single sample. An  
137 average of 28,826 reads were assigned for a single cell as the 5'-end mRNA gene expression



138 information (Table S2). Each sample was individually clustered and visualized by UMAP (Figs.  
139 1B and 1C). Even without employing a batch-effect removing procedure, the images were  
140 mostly overlapped between individual experiments (Fig. 1B; for more details, see Table S2).  
141 Each cluster was annotated for a cell type using canonical cell markers (Fig. 1C and 1D). The  
142 cells belonging to each cell type were counted as the corresponding cell populations. The  
143 relative percentage of major cell types constituting the PBMCs was calculated for all the  
144 datasets (for statistics, see Tables S3 and S4).

145         First, we evaluated the reproducibility and reliability of the data obtained. At the same  
146 time, the effect of sample freezing was also evaluated. It is convenient to freeze samples after  
147 collection and keep them in a freezer until an appropriate time for library preparation. However,  
148 the exact effect sample freezing has on the PBMC transcriptome has not been fully evaluated.  
149 For this purpose, we prepared libraries from the same material to subject to two conditions:  
150 fresh (H1 Day 0 Fresh and H2 Day 0 Fresh) and frozen (H1 Day 0 frozen and H2 Day 0 frozen)  
151 (Fig. 1E, and red dotted line). Except for several specific particular cell types or a small group  
152 of genes in particular cell types that were excluded from the following analysis, there was no  
153 noticeable difference between the fresh and frozen sample in the total cell populations and gene  
154 expressions (Fig. 1F- 1I; also note that some NK cells seemed damaged by the sample freezing,  
155 which were detected as the increased representation of mitochondria genes; other low

156 correlated genes are shown in Table S5). Therefore, we used frozen samples for further  
157 analyses. In the following analyses, we will describe some characteristic features between  
158 different individuals (see below). However, these distinct features were within the range of daily  
159 changes; therefore, each data was represented by nine independent experimental replicates.  
160 Collectively, we concluded that the collected data should be highly reproducible and reliable for  
161 the following analysis.

162

### 163 *Diversity of the scRNA-seq profiles between different individuals and different time points*

164 When we examined the resulting scRNA-seq profiles (Fig. 1E, and Table S4), the annotated cell  
165 type composition roughly agreed with those previously estimated(Verhoeckx et al. 2015), that  
166 is, typically, lymphocytes (T cells, B cells, and NK cells) ranging 70- 90 %, monocytes  
167 accounting for 10-20%, and DCs and other populations being rare. Within the lymphocyte  
168 population, cell types include CD3<sup>+</sup> T cells (70- 85 %), B cells (5- 10 %), and NK cells (5-  
169 20 %). The CD3<sup>+</sup> T cells consist of CD4<sup>+</sup> T cells and CD8<sup>+</sup> T cells in approximately 2:1 ratio.

170 Despite the overall concordance with previous estimates, cell compositions differed  
171 across individuals and sampling time points even within the same individual. At a glance,  
172 higher proportions of B cells were detected in H1 (Fig. 2A). On the other hand, CD8<sup>+</sup> T cells

173 and NK cells proportions were higher in H2 (Fig. 2A, Table S3). More specifically, naïve B  
174 cells and non-vd2  $\gamma\delta$  T cells were highly represented in H1 (Fig.2A). Unlike usual T cells  
175 expressing  $\alpha$  and  $\beta$  TCR chains, these non-vd2  $\gamma\delta$  T cells do not necessarily require antigen  
176 representation via the MHC class I molecule for their activation(Weese et al. 2012), although  
177 their antigen recognition mechanism has not been fully characterized. These results suggested  
178 the possibility that the H1 immune landscape might be inclined to the humoral immune  
179 mechanism. On the other hand, the immune system in H2 can put a greater strain on the TCR-  
180 dependent response. Although some variations depended on the time points, these differences  
181 were characteristic to the individuals with statistical significance (p-values are shown in panels  
182 and legend; Fig. 2A).

183 We also characterized the activation states by measuring gene expressions across  
184 different time points using the representative cell types in H1 and H2 in order to understand  
185 how active the immune cells in healthy subjects. For representative active markers of CD8<sup>+</sup> T  
186 cells and NK cells, we found that their expression levels were almost similar between H1 and  
187 H2, in spite that some daily changes were observed. Figure 2B- 2E exemplifies the case of  
188 Perforin (Osińska et al. 2014) and Granzyme A (Shi et al. 1992; Hayes et al. 1989). A similar  
189 observation was obtained for the activation state of B cells (Figs. 2F and 2G). These results  
190 suggested that the difference between H1 and H2 under healthy conditions was rather

191 represented by the number of the corresponding cells, but not always the activation states of the  
192 individual cells.

193

#### 194 *Immune cells diversity in seven individuals of varying backgrounds*

195 To further assess the diversity of cell compositions across individuals, we compared  
196 the cell type proportions of the other seven individuals (Figs. 3A and 3B). The ninth (final)  
197 sample was taken as a representative for H1 and H2. As described above, H1 had a higher  
198 proportion of B cells than H2, and this trend even remained the most relevant among all samples  
199 (Figs. 3A and 3B). Particularly, the plasmablast population was far higher than the average of  
200 the other samples (2.8% and 0.15% for H1 and H2, respectively). On the other hand, H3 and H4  
201 showed even higher frequency of non-vd2  $\gamma\delta$  T cells than H1, suggesting that this feature is not  
202 totally unique to H1. Furthermore, H2 had high representations of memory CD4<sup>+</sup> T cells,  
203 effector CD8<sup>+</sup> T cells and MAIT cells in H3, and vd2  $\gamma\delta$  T cells in H4 (Fig. 3B, Table S3). All  
204 individuals showed, in part similar, but a wide variety of unique features.

205 Among them, H7 showed a unique profile (Fig. 3A). The cellular population and the  
206 gene expression profiles of individual cells suggested that NK cells are in the active state in this  
207 individual (Figs. 3C and 3D). This individual is an older adult and has experienced malignant B

208 cell lymphoma (Fig. 1A, bottom, inset table). The cytotoxicity of NK cells has a high anti-tumor  
209 potential(Vivier et al. 2008). NK cells are often suppressed in blood cancer patients when the  
210 disease is in a malignant stage. However, as patients recover, the reactive population of NK  
211 cells increases, resulting in disease remission(De Kouchkovsky and Abdul-Hay 2016).  
212 Although more than five years have passed since the complete elimination of malignant B cells  
213 by successful R-CHOP chemotherapy, the remaining large proportion of NK cells in H7 may  
214 have expanded during therapy. A recent study reported that prolonged expansion of clonal NK  
215 cells occasionally occurs after recovery. In fact, a sustained expansion of NK cells may suggest  
216 clonal expansion because of response to any chronic stimulation(Adams et al. 2020) or or  
217 acquisition of somatic mutations(Olson et al. 2021). Collectively, the results suggest that healthy  
218 individuals hold a prominent baseline immunological diversity.

219           Before further exploring the observed difference, we considered the validation using  
220 other methods to validate whether the observed diversity should correctly represent the diversity  
221 between individuals. For this purpose, Cytometry of Time-Of-Flight (CyTOF), analysis was  
222 employed. This method utilizes the mass cytometer HeliosTM, using heavy metal isotope-  
223 tagged antibodies to detect PBMCs proteins at the single-cell resolution(Spitzer and Nolan  
224 2016). Four samples (H1, H2, H3, and H5) were subjected to the analysis (Figs. 3E and 3F).  
225 Comparing the transcriptome and proteome datasets showed that the detected cellular

226 compositions were roughly equivalent regardless of the analytical methods (Fig. 3G). It is true  
227 that, the transcriptome data gave a larger inclination than the proteome data for some cell types,  
228 while the opposite was observed for other cell types (see Table S6 for details). Probably these  
229 observations were because mRNA and protein levels are not strictly equal. Nevertheless, we  
230 found a high correlation between transcriptome and proteome data in almost all cases. Thus, the  
231 observed diversities of immune cell profiles are validated from this viewpoint.

232

### 233 *Time-lapse changes of the immune landscapes in T cell populations*

234 We attempted to further characterize the diversity of immune cell responses by  
235 considering the VDJ regions of TCR or their “clonotypes”. Using the Chromium platform, the  
236 VDJ-seq libraries were constructed from the intermediate products of the library construction  
237 for the scRNA-seq (see Table S7 for the sequencing statistics). Since the cell barcodes were  
238 shared between the VDJ-seq and scRNA-seq libraries from the same sample, we could associate  
239 the observed VDJ information with the transcriptome information of its expressing T cell for  
240 each cell. Similarly, in the case of scRNA-seq, for H1 and H2, data was collected from nine  
241 points for H1 and H2 over a month (H1 Day 0 to H1 Day 84, and H2 Day 0 to H2 Day 84,  
242 Table S1).

243 For H1 and H2, even the ten most frequent clonotypes claimed a small proportion of  
244 the overall annotated cell population. Furthermore, the ten most frequent clonotypes were  
245 unique to each individual, and no explicit overlap was observed (Fig. 4A). Nevertheless, some  
246 features in the pattern of the compositions and their changes were commonly observed between  
247 H1 and H2 (Fig. 4B; see Table S8 for more details). We examined and found that the clonotypes  
248 that were unique within the same individual over different time points (“sporadic” clonotypes)  
249 were mostly from naive T cells, probably representing a unique repertoire of unstimulated T  
250 cells in the individual (Figs. 4D- 4F). On the other hand, as for the clonotypes detected from  
251 several time points, effector and memory CD8<sup>+</sup> T cells were dominant (Figs. 4D- 4F). Of note,  
252 from those “sustained” T populations, MAIT cells accounted for a significant population (Fig.  
253 4F).

254 Interestingly, we could trace the time-lapse transition of their expressing T cell for  
255 some of those sustained clonotypes (Fig. 4F). For example, for a particular clonotype, as shown  
256 in Fig. 4G, its expressing T cells were effector CD8<sup>+</sup> T cells. This proportion decreased within a  
257 week and memory CD8<sup>+</sup> T cell appeared on Day 21. This individual could have been infected  
258 with a pathogen in his/her self-presumed healthy state (Fig. 4G, left). Similar situation was also  
259 confirmed in H2 (Fig. 4G, right). Accordingly, the activation of T cell populations may  
260 constantly occur even in the “healthy” condition. We further searched from H1 and H2 and

261 identified a total of 85 and 209 clonotypes increased and decreased during this time-frame.

262 Immune cells may undergo constant changes, responding to environmental epitopes, and such

263 responses may have shaped the unique immune landscape of the individual over long years.

264

### 265 *Diversity of TCRs and searching for their possible epitopes*

266 We conducted a similar TCR analysis for the other individuals. Despite the reduced

267 data points for other samples, similar trends were also observed for H4 and H6, although their

268 exact VDJ sequences were, again, unique to the individuals (Fig. 4A). Of note, in H3, the most

269 and the second-most frequent clonotype claimed were clonotype 1 (13.4%) and clonotype 2

270 (4.8%), respectively (Fig. 4A). We carefully ruled out the possibility that these were derived

271 from PCR and other artifacts by manually inspecting the correct assignment of cell barcode and

272 unique molecular index. Particularly for this clonotype, we dissolved their TCR states by

273 utilizing the scRNA-seq information. We found that clonotype 1 and 2 were mostly for effector

274 CD8<sup>+</sup> T cells, suggesting that some asymptomatic infection events are on-going (Fig. 4H).

275 As for H3, this individual is originally from a suburb in Indonesia. Considering the

276 country of his/her upbringing, we postulated that this individual may have frequently

277 experienced the infections of CMV, EBV and other common pathogens. We conducted the



278 intracellular cytokine staining assay (ICS assay) for H1, H2 and H3 samples (Fig. 4I). We  
279 found that H3 showed the highest response for the CMV stimulation. Similar responses were  
280 found for EBV (Fig. 4I). In H3, the immune system generally may remain alerted, which could  
281 be a common trait for individuals originally from developing countries. Supportingly, when we  
282 attempted to infer potential epitopes for the clonotypes detected in H1- H3, using the deduced  
283 amino acid sequences of the CDR3 region, which is the docking platform for the epitopes, for  
284 the bioinformatics prediction pipeline and epitope databases TCRex(Gielis et al. 2019) and  
285 VDJdb(Shugay et al. 2018) , we found that cytomegalovirus (CMV) and Epstein-Barr virus  
286 (EBV) appeared to be potential candidates for the TCRs more frequently in H3 (Tables S9).

287

### 288 *Diversity of BCRs*

289 We conducted a similar analysis for BCRs (sequence statistics are shown in Table S7). Even to  
290 a lesser extent than the TCRs, the BCR clonotypes did not overlap within the same individual  
291 over time, particularly for the usage of the immunoglobulin heavy chain (99% were uniquely  
292 observed; Fig. 5A). The major unique clonotypes were mostly for IgH-M in H1, suggesting that  
293 there is constant activation of B cells for possible novel antigens in this individual (Fig. 5B). On  
294 the other hand, IgH-G was more relevant within a minor population of overlapping clonotypes

295 at different time points, and possibly represented the sustained activation of the corresponding  
296 clonotypes. A similar trend was observed for H2 (Fig. 5B), but to a lesser extent than H1. We  
297 further examined the overall entropy of the BCRs. The distribution of the Shannon index  
298 showed that H1 had the higher entropy than H2 and the other individuals (Fig. 5C), although  
299 daily changes were observed in this aspect (Fig. 5D). As well as TCRs, diversity of BCR in  
300 naïve B cells are considered to be higher than that of memory B cells, which have already  
301 experienced clonal expansion by specific antigen stimulation. The higher entropy of BCRs in  
302 H1 may reflect higher frequency of naïve B cells. When we analyzed the frequency of the  
303 variant regions, we found that the H1 showed a focused use of particular variant types, although  
304 their precise clonotypes were diverse (Fig. 5E). These results showed that BCR profiles also  
305 vary between individuals. They also collectively indicated, again, that B cell-mediated immune  
306 responses are prominent in H1.

307

### 308 *Influence of the vaccination on the immune cell profiles*

309 We considered vaccination an ideal usual life event to further characterize the personal  
310 immune landscapes and their changes. During vaccination, the exact antigen is defined, and the  
311 exposure time is known. We first collected PBMC samples from H1 and H2 before and after

312 influenza vaccination (antigen was for the 2020, see Methods). Relevant antibodies titers were  
313 confirmed by the antibody quantification method (Table S10). Samples were collected on Day -  
314 1, 1, 3, 7, and 28 of vaccination and subjected to similar scRNA-seq and VDJ seq analyses for  
315 TCRs and BCRs (Fig. 6A and see Tables S2 and S7 for the sequencing statistics).

316           Again, diverse immune cell profiles between different individuals and time points  
317 were found for this time-lapse dataset. Significant differences were observed in response to the  
318 vaccination between H1 and H2 (Fig. 6B). The distinct responses appeared, representing their  
319 original immune landscapes (see below). Nevertheless, several common features were observed,  
320 generally consistent with previous knowledge describing general features of immune cell  
321 responses. For example, expansion of monocytes, primarily CD14<sup>+</sup> classical monocytes, were  
322 detected as the primary responder of the stimulation immediately after vaccination. This  
323 induction was followed by a temporary reduction of naïve B cells in PBMC (Fig. 6B). CD4<sup>+</sup> T  
324 cells and  $\gamma\delta$  T cells were also temporarily reduced for T cell populations, while CD8<sup>+</sup> T cells,  
325 NK cells, and DCs cells retained their original population sizes. For these profiles, we also  
326 conducted the validation analysis using CyTOF and confirmed the robust representation of the  
327 observed results (Fig. 6C- 6E). Of note, these initial responses were recovered to their original  
328 levels by Day 28 post-vaccination, when the immune responses are estimated to be complete  
329 and memory cells established (Fig. 6B).

330           Although the above responses applied to H1 and H2 in general, several unique features  
331    appeared to depend on the individual. For example, in H1, the population of MAIT cells were  
332    particularly reduced from PBMC at the initial response from 2.7% to 0.2% in scRNA-seq (2.6%  
333    to 0.2% in CyTOF) (Fig. 6F, top right). In addition, the response of CD4<sup>+</sup> T cells was more  
334    pronounced than that of H2 (Fig. 6F, bottom center), while the population of CD8<sup>+</sup> T cells was  
335    larger at all times (Fig. 6F, bottom right), perhaps recapturing the dominant humoral responses  
336    in H1 (Fig. 6B).

337           We inspected the changes of TCR clonotypes in response to vaccination (Fig. 6G and  
338    6H, Figure S1). The TCR repertoire and clonotypes detected before vaccination were removed  
339    to focus on the specific response to the vaccination. A total of 10 VDJ sequence datasets were  
340    used for the subtraction for each individual (see Tables S7 for the statistics).

341           For the remaining clonotypes obtained, we attempted to identify the clonotypes  
342    showing dynamic changes in response to the vaccination (Fig. 6I). Again, we observed that  
343    some clonotypes sporadically appeared in a particular time point; others were persistent. We  
344    compared the T cell populations between those sporadic and persistent populations. We found  
345    that the CD4<sup>+</sup> and CD8<sup>+</sup> naïve T cells were characteristic in the sporadic population, suggesting  
346    that these could be the clonotypes that were not removed by the subtraction. On the other hand,

347 CD4<sup>+</sup> and CD8<sup>+</sup> memory T cells as well as MAIT cells were more relevant in the persistent  
348 population, suggesting that the clonotypes firstly induced by vaccination were enriched in this  
349 population. Some examples are shown for the clonotypes which showed dynamic changes (Fig.  
350 6I), as the candidate T cells first induced in response to vaccination. At least, a total of 16 and  
351 53 such clonotypes were detected, in H1 and H2, respectively.

352 As for the BCR repertoire, we did not find any relevant overlapping clonotypes as  
353 shown in the above analysis (Figs. 6J and 6K). When we examined their complexity (Fig. 6L),  
354 we found that the entropy score increased on Day 3 as an immediate response of BCRs. This  
355 induction recovered to the original level gradually by Day 28. To different extent, this trend was  
356 commonly observed for both H1 and H2 (Fig. 6L). The variant analysis also showed that the  
357 particular variants were induced on day three (Fig. 6M). These results indicated that the B cell  
358 system was also responding to vaccination, again to varying degrees in different individuals.

359

### 360 *Responses of TCR clonotypes in response to the SARS-CoV-2 vaccinations*

361 We conducted a similar analysis for vaccination against SARS-CoV-2 (see Tables S2  
362 and S7 for the statistics). This time, the mRNA vaccine of BNT162b2 produced by Pfizer-  
363 BioNTech was considered. PBMC samples from H1, H6, and H7 individuals were used for

364 analysis (Fig. 7A). Relevant increases in the antibody titers were measured by standard antibody  
365 quantification (Figs. 7B and 7C, Table S10).

366           Similar features with influenza vaccination were observed here. These responses were  
367 also generally consistent with the results of a recently published paper(Ewer et al. 2021). These  
368 features include the immediate induction of monocytes and eventual restoration of the immune  
369 cell states (Fig. 7D, Figure S2 for the CyTOF datasets). Those changes were more significant  
370 than the case of the Influenza vaccination, possibly reflecting more intensive nature of the  
371 SARS-CoV-2 vaccine. Again, we examined and found that the strength and the timing of such  
372 responses depend on the original immune landscapes (see below for an exceptional case of H7).  
373 Notably, the initial induction of monocytes was generally higher with SARS-CoV-2, perhaps,  
374 consistent with the fact that inflammatory side effects of this vaccine, such as fever and  
375 inflammation, in this individual was stronger than the influenza vaccine. It should also be noted  
376 that, in this case, CD16<sup>+</sup> non-classical monocytes were also induced, followed by the induction  
377 of CD14<sup>+</sup> classical monocytes, indicating an enhanced immune response of this vaccination. In  
378 the second vaccination of H1 and H6 (Figs. 7E and 7F), the same response as mentioned above  
379 was observed.

380           We particularly attempted to inspect the changes of clonotypes after SARS-CoV-2  
381   vaccination (sequencing stats shown in Table S7). The pre-vaccination TCR clonotypes were  
382   collectively removed. To particularly focus on the responses specific to the SARS-CoV-2  
383   vaccine, all the VDJ sequences observed for influenza vaccination analysis were also subtracted  
384   (Figs. 7G and 7H). Consistent with influenza vaccination, the majority of the clonotypes were  
385   only detected at a single time point, reflecting the complexity of the TCR population.  
386   Nevertheless, a total of 20 and 62 clonotypes were identified from more than three-time points,  
387   in H1 and H6 datasets. Similar to influenza vaccination, characteristic sub-populations of the  
388   sporadic and persistent populations were also observed with SARS-CoV-2 vaccination (Figs.  
389   7G and 7H, detailed in Figure S3).

390           To further characterize these sporadic and persistent populations, we examined the  
391   gene expression level of CD69 as a marker for activation of T cells. We found that the T cells of  
392   the persistent group showed higher CD69 levels, suggesting that those cells were in an active  
393   state (Figs. 7I and 7J). We further traced their time-lapse changes and identified several  
394   clonotypes that were induced at some time points. Most of those T cells were induced at the first  
395   vaccination and then further enhanced by the second vaccination (Figs. 7K and 7L). These  
396   TCRs may represent the cells that were specifically induced by this vaccination.

397                    Interestingly, H7 showed an overall unique character. As described above, this  
398 individual originally had a higher percentage of NK cells. When we examined the changes in  
399 the immune cell profiles in H7 (Fig. 7D), the changes in the immune cell profiles were less  
400 relevant than H1 and H6. This observation may reflect the advanced age of this individual or a  
401 generally high level of NK cell-centered immune cell activity in its pristine state, possibly based  
402 on that individual's medical history (Fig 1A, bottom, inset table). Although this individual  
403 eventually acquired a sufficient antibody level, the level obtained was, to some extent, lower  
404 than H1 and H6. Consistently, the changes of the CD69 levels were less significant, which in  
405 turn suggest that the vaccine responses depend on the original immune state of the individuals.

## 406    ***DISCUSSION***

407    In this study, we attempted to describe the diversity of the immune cell profiles in PBMC  
408 amongst healthy individuals. We revealed that the gene cellular components and gene  
409 expression profiles are diverse even in healthy individuals, possibly reflecting the personal  
410 history of previous immune responses. The unique point of this study is that we employed  
411 intensive scRNA-seq transcriptome and TCR VDJ sequencing analyses validated by single-cell  
412 mass spectrometry analysis. This approach could track a single clonotype across the sampling  
413 time points in association with its expressing T cell state. To the best of our knowledge,



414 although there may be some previous studies which have analyzed immune cell profiles of  
415 healthy individuals, those studies used the Western population. In this study, we considered the  
416 Asian populations, which are supposed to show distinct immune responses to various  
417 pathogens, including SARS-CoV-2. By collecting and re-analyzing the previous data for the  
418 Western population and comparing it with the data of the present study, the immunological  
419 difference in health status will also be unveiled. Such insight is particularly of interest,  
420 considering that in the early stages of the COVID-19 pandemic, allegations were made that  
421 ethnicity may be responsible for the variability in susceptibility and morbidity  
422 worldwide(Barash et al. 2020; Sze et al. 2020; Bunyavanich et al. 2020; El-Khatib et al. 2020;  
423 Hou et al. 2020). Also. the difference in immune responses is also associated with the  
424 effectiveness of the vaccination. There are some papers describing the cause of such ethnic  
425 differences as the pre-existing discrepancies in health equity, such as access to healthcare and  
426 social determinants of health, and likely not genetics(Shelton et al. 2021; Lee et al. 2020). The  
427 ethnicity effects on immune response should also consider their medical records and the current  
428 environments .

429           The obvious drawbacks of the present study include the general lack of in-depth  
430 biological validations. In particular, the results of the epitope identification were not validated  
431 for various pathogens. More generally, even after long discussions, the extent to which PBMC

432 should represent the immune states of the individual remains debatable. Also, the small sample  
433 size and especially the short sampling period also limits the comparability of the results to  
434 previous in vitro laboratory studies. Particularly for the immune response to the vaccination,  
435 careful analyses are needed to elucidate what molecular events are occurring there in more  
436 detail. However, it is generally technically difficult to validate the unique events taking place in  
437 individuals overtime of their personal histories.

438           Nevertheless, it is significant that we could identify the individual heterogeneity of  
439 healthy immunity. The main aim of this study paper is to generate a base for such future studies  
440 to address the issues named above. In particular, the inter-individual heterogeneity was more  
441 pronounced than the intra-individual temporal variance. Therefore, future studies investigating  
442 immune system fluctuations in disease should account for the baseline diversity amongst  
443 healthy individuals, as demonstrated in this study.

444           No less important, we consider the present study results have indicated the importance  
445 of data collection for particular individuals. The immune cell profiles should be so diverse that in  
446 the event of a disease, the healthy state information should be directly subtracted, and the status  
447 of the immune cell analyzed. It is important to know the state of immune cells for infectious  
448 diseases and various types of other diseases, such as cancers. Recently, many anti-cancer drugs

449 are designed to control proper or enhanced actions of the immune cells(June et al. 2018).  
450 Importantly, once the disease develops, the profile of the healthy states would be lost; thus, such  
451 information should be collected beforehand. This direction should be followed by the need for  
452 “personal immunological records.”. The records may include not only the data resource but also  
453 the banked biomaterial samples.

454           Personal health or medical histories, which differ depending on the immune responses  
455 experienced throughout their lives, should have collectively shaped their current immune  
456 landscapes. Such a landscape is the base to determine his or her unique immune condition in the  
457 daily life or to predict or control his or her response to various diseases.

458 Therefore, the "personal immune landscape" may become the data resource which should be  
459 prepared ideally for each individual. The present study should have paved the first step towards  
460 the new era of “personalized genomics” research and its social applications.

461

462 ***METHODS***

463 ***Ethics approval and consent to participate***

464 The human materials were collected and analyzed following the procedure approved by the ethical  
465 committee of the University of Tokyo as examination number: 20-351. All human subjects  
466 provided written informed consent.

467

#### 468 *Library Preparation and Sequencing*

469 PBMCs samples were collected from seven healthy donors (Table 1). Two participants, H1 and  
470 H2, had their PBMCs collected nine times over a month (Fig. 1A). A single sample was collected  
471 for the other participants. Except for the first sample from H1 and H2, samples were frozen and  
472 thawed before processing. Each sample was processed with the Chromium Next GEM Single Cell  
473 5' Library and Gel Bead Kit following the manufacturer's user guide (10x Genomics, v1.1). After  
474 cDNA amplification, the B cell and T cell V(D)J were enriched using the human B cell and T cell  
475 enrichment kit before TCR and BCR library construction. The prepared 5' GEX, TCR, and BCR  
476 libraries were then sequenced using the Illumina NovaSeq sequencer.

477

#### 478 *Cell Type Annotation in sequencing dataset*

479 The 5' GEX dataset was initially processed with Cell Ranger (v.3.1.0 for the daily variation study,  
480 and version v5.1.0 for influenza and SARS-CoV-2 vaccination study), and underwent quality

481 control and clustering by the R package Seurat (version 3.2 for daily variation study, and version  
482 4.1 for influenza and SARS-CoV-2 vaccination study)(Stuart et al. 2019). Each cluster was  
483 primarily annotated on the differentially expressed gene set and the canonical markers retrieved  
484 from literature(Tian et al. 2019; Martos et al. 2020). T cells were identified based on *CD3D* and  
485 were determined as CD8<sup>+</sup> or CD4<sup>+</sup> depending on *CD8A* or *CD4* expression, respectively. CD8<sup>+</sup>  
486 T cells were further classified into effector (*GZMK*, *GZMH*, *PRF1*, *CCL5*), memory (*CD29*) and  
487 naïve (*CCR7*). CD4<sup>+</sup> T cells were similarly classified into naïve (*IL7R*, *CCR7*), memory (*IL7R*,  
488 *S100A4*), Treg (*FOXP3*). Other T cells included MAIT cells (*SLC4A10*, *TRAV1-2*) and  $\gamma\delta$ T cells  
489 (*TRGV9*, *TRDV2*). B cells were identified if *MS4A1*<sup>+</sup> and were labeled naïve if *CD27*<sup>-</sup>. Plasma B  
490 cells were *MZB1*<sup>+</sup>/*XBPI*<sup>+</sup>. Monocytes were grouped into either classical monocytes (*CD14*, *LYZ*),  
491 or non-classical monocytes (*FCGR3A*, *MS4A7*). DCs were typed as myeloid DCs (*FCERIA*,  
492 *CD1C*), and plasmacytoid DCs (*FCERIA*, *LILRA4*). We further identified NK cells (*GNLY*,  
493 *NKG7*, *CD56*) and platelets (*PPBP*). Additionally, SingleR (Aran et al. 2019) and Azimuth(Hao  
494 et al. 2021) was referenced to assist manual labeling where necessary. SingleR labels new cells  
495 from a test dataset based on similarity to a given reference dataset of samples with known labels,  
496 derived from either single-cell or bulk RNA-seq. This study used a publicly available bulk RNA-  
497 seq dataset of sorted immune cells as a reference for SingleR imputation(Monaco et al. 2019).  
498 Azimuth uses a precomputed supervised PCA (SPCA) transformation, a supervised version of

499 principal component analysis to identify the best transcriptomic modules that delineate Weighted  
500 Nearest Neighbor-defined cell types.

501

### 502 *T cell Receptor and B cell Receptor Analysis*

503 For scVDJ-seq of BCR and TCR, data were processed using Cell Ranger (v.3.1.0 for the daily  
504 variation study and version v5.1.0 for the influenza and SARS-CoV-2 vaccination study). For  
505 BCR analysis, data were analyzed by scRepertoire(Borcherding et al. 2020).

506

### 507 *Analysis using Mass Cytometry*

508 We analyzed frozen PBMC samples using Helios Mass Cytometer (Fluidigm, sample list is shown  
509 in Table S17). We applied mass cytometry (CyTOF) using the Maxpar® Direct™ Immune  
510 Profiling Assay™ to characterize PBMCs. Samples are processed following vendors' guide  
511 (Quick Reference guide JPN\_PN 400288 B1\_001). Briefly, counted PBMCs are washed with cell  
512 staining buffer and processed with FcX. Cells are stained with 30 antibodies shown in Key  
513 resources table. After cell staining, cells are fixed with 1.6% formaldehyde. Stained cells are  
514 analyzed with Helios. Datasets were analyzed with Maxpar Pathsetter.

515

516 *Antibody Titration*

517 In the influenza vaccination study, we measured the antibody titer for type A-H1, type A-H3, type  
518 B-Yamagata, and type B-Victoria flu using HI method. In the SARS-CoV-2 vaccination study,  
519 we measured the antibody titer anti-SARS-CoV-2 S IgG and anti-SARS-CoV-2 S IgM.

520

521 *Intracellular cytokine staining assay using Flow Cytometry*

522 In the intracellular cytokine staining assay, we stimulated PBMC of H1, H2 and H3 with CMV  
523 (pp65 and IE1), EBV (EBNA1, LMP1, and BZLF1) and incubated for six hours in 37C. For  
524 staining, we used FITC (CD4), PE (CD107a), PerCP (CD8a), PE-Cy7 (IL2), APC (TNFa),  
525 APC-Cy7 (IFNg), Pacific Blue (CD3) and LIVE/DEAD Aqua-Amcyan Antigen for staining  
526 cells. We employed BD FACSCanto (BD) and the sort logic was set by gating lymphocytes by  
527 forward scatter and side scatter and then gating on CD3<sup>+</sup> CD4<sup>+</sup> cells and CD3<sup>+</sup> CD8<sup>+</sup> cells. The  
528 dataset was analyzed by FlowJo software.

529

530 ***DATA ACCESS***

531 The raw data has been deposited to National Bioscience Database Center as study number:

532 JGAS000321. The present study did not develop any new software. All code used in the present

533 study can be available upon request to Lead Contact, Yutaka Suzuki ([ysuzuki@hgc.jp](mailto:ysuzuki@hgc.jp)).

534

535 ***COMPETEING INTEREST STATEMENT***

536 The authors decliare that no competing interests exits.

537 ***Funding***

538 This work was supported by JST Moonshot R&D – MILLENNIA Program Grant Number

539 JPMJMS2025.

540 ***Author's Contributions***

541 Y.K. performed scRNA-seq experiment, visualizeds scRNA-seq and CyTOF results and drafted

542 the manuscript. P.R. performed CyTOF experiment. N.Y. performed the analysis of scRNA-seq.

543 L.R., S.N., and M.O. were involved in blood sample collection and contributed to drafting

544 manuscripts. K.K., A.S., M.Seki, M.Sakata, Y.I., A.K.T., K.H.N., and T.M. contributed to

545 drafting manuscripts. Y.S. supervised the project. All authors reviewed, approved, and accepted

546 the manuscript.

547 ***Acknowledgments***



548 We thank all the anonymous donors who participated in this study. We appreciate Shintaro  
549 Yanagimoto for supporting immunological studies. We thank K. Imamura, K. Abe, Y. Ishikawa,  
550 M. Konbu, E. Kobayashi, E. Ishikawa, and S. Minamiguchi, Y. Kuze for their technical  
551 assistance.

## 552 **References**

- 553 Adams NM, Grassmann S, Sun JC. 2020. Clonal expansion of innate and adaptive lymphocytes.  
554 *Nat Rev Immunol* **20**: 694–707. <http://www.nature.com/articles/s41577-020-0307-4>.
- 555 Aran D, Looney AP, Liu L, Wu E, Fong V, Hsu A, Chak S, Naikawadi RP, Wolters PJ, Abate  
556 AR, et al. 2019. Reference-based analysis of lung single-cell sequencing reveals a  
557 transitional profibrotic macrophage. *Nat Immunol* **20**: 163–172.  
558 <http://www.ncbi.nlm.nih.gov/pubmed/30643263>.
- 559 Barash A, Machluf Y, Ariel I, Dekel Y. 2020. The Pursuit of COVID-19 Biomarkers: Putting  
560 the Spotlight on ACE2 and TMPRSS2 Regulatory Sequences. *Front Med* **7**: 582793.  
561 <http://www.ncbi.nlm.nih.gov/pubmed/33195331>.
- 562 Borcherding N, Bormann NL, Kraus G. 2020. scRepertoire: An R-based toolkit for single-cell  
563 immune receptor analysis. *F1000Research* **9**: 47.  
564 <http://www.ncbi.nlm.nih.gov/pubmed/32789006>.

- 565 Bunyavanich S, Grant C, Vicencio A. 2020. Racial/Ethnic Variation in Nasal Gene Expression  
566 of Transmembrane Serine Protease 2 (TMPRSS2). *JAMA* **324**: 1567–1568.  
567 <http://www.ncbi.nlm.nih.gov/pubmed/32910146>.
- 568 De Kouchkovsky I, Abdul-Hay M. 2016. “Acute myeloid leukemia: a comprehensive review  
569 and 2016 update”. *Blood Cancer J* **6**: e441.  
570 <http://www.ncbi.nlm.nih.gov/pubmed/27367478>.
- 571 El-Khatib Z, Jacobs GB, Ikomey GM, Neogi U. 2020. The disproportionate effect of COVID-  
572 19 mortality on ethnic minorities: Genetics or health inequalities? *EClinicalMedicine* **23**:  
573 100430. <http://www.ncbi.nlm.nih.gov/pubmed/32572393>.
- 574 Ewer KJ, Barrett JR, Belij-Rammerstorfer S, Sharpe H, Makinson R, Morter R, Flaxman A,  
575 Wright D, Bellamy D, Bittaye M, et al. 2021. T cell and antibody responses induced by a  
576 single dose of ChAdOx1 nCoV-19 (AZD1222) vaccine in a phase 1/2 clinical trial. *Nat*  
577 *Med* **27**: 270–278. <http://www.ncbi.nlm.nih.gov/pubmed/33335323>.
- 578 Gielis S, Moris P, Bittremieux W, De Neuter N, Ogunjimi B, Laukens K, Meysman P. 2019.  
579 Detection of Enriched T Cell Epitope Specificity in Full T Cell Receptor Sequence  
580 Repertoires. *Front Immunol* **10**: 2820. <http://www.ncbi.nlm.nih.gov/pubmed/31849987>.

- 581 Golubovskaya V, Wu L. 2016. Different Subsets of T Cells, Memory, Effector Functions, and  
582 CAR-T Immunotherapy. *Cancers (Basel)* **8**.  
583 <http://www.ncbi.nlm.nih.gov/pubmed/26999211>.
- 584 Hao Y, Hao S, Andersen-Nissen E, Mauck WM, Zheng S, Butler A, Lee MJ, Wilk AJ, Darby C,  
585 Zager M, et al. 2021. Integrated analysis of multimodal single-cell data. *Cell* **184**: 3573-  
586 3587.e29. <http://www.ncbi.nlm.nih.gov/pubmed/34062119>.
- 587 Hayes MP, Berrebi GA, Henkart PA. 1989. Induction of target cell DNA release by the  
588 cytotoxic T lymphocyte granule protease granzyme A. *J Exp Med* **170**: 933–46.  
589 <http://www.ncbi.nlm.nih.gov/pubmed/2788710>.
- 590 Hou Y, Zhao J, Martin W, Kallianpur A, Chung MK, Jehi L, Sharifi N, Erzurum S, Eng C,  
591 Cheng F. 2020. New insights into genetic susceptibility of COVID-19: an ACE2 and  
592 TMPRSS2 polymorphism analysis. *BMC Med* **18**: 216.  
593 <http://www.ncbi.nlm.nih.gov/pubmed/32664879>.
- 594 June CH, O'Connor RS, Kawalekar OU, Ghassemi S, Milone MC. 2018. CAR T cell  
595 immunotherapy for human cancer. *Science (80- )* **359**: 1361–1365.  
596 <https://www.sciencemag.org/lookup/doi/10.1126/science.aar6711>.

- 597 Lee I-H, Lee J-W, Kong SW. 2020. A survey of genetic variants in SARS-CoV-2 interacting  
598 domains of ACE2, TMPRSS2 and TLR3/7/8 across populations. *Infect Genet Evol* **85**:  
599 104507. <http://www.ncbi.nlm.nih.gov/pubmed/32858233>.
- 600 Martos SN, Campbell MR, Lozoya OA, Wang X, Bennett BD, Thompson IJB, Wan M, Pittman  
601 GS, Bell DA. 2020. Single-cell analyses identify dysfunctional CD16<sup>+</sup> CD8 T cells in  
602 smokers. *Cell reports Med* **1**. <http://www.ncbi.nlm.nih.gov/pubmed/33163982>.
- 603 Minervina A, Pogorelyy M, Mamedov I. 2019. T-cell receptor and B-cell receptor repertoire  
604 profiling in adaptive immunity. *Transpl Int* **32**: 1111–1123.  
605 <http://www.ncbi.nlm.nih.gov/pubmed/31250479>.
- 606 Monaco G, Lee B, Xu W, Mustafah S, Hwang YY, Carré C, Burdin N, Visan L, Ceccarelli M,  
607 Poidinger M, et al. 2019. RNA-Seq Signatures Normalized by mRNA Abundance Allow  
608 Absolute Deconvolution of Human Immune Cell Types. *Cell Rep* **26**: 1627-1640.e7.  
609 <http://www.ncbi.nlm.nih.gov/pubmed/30726743>.
- 610 Nicholson LB. 2016. The immune system. *Essays Biochem* **60**: 275–301.  
611 <http://www.ncbi.nlm.nih.gov/pubmed/27784777>.
- 612 Olson TL, Cheon H, Xing JC, Olson KC, Paila U, Hamele CE, Neelamraju Y, Shemo BC,  
613 Schmachtenberg MW, Sundararaman SK, et al. 2021. Frequent Somatic TET2 Mutations

- 614 in Chronic NK-LGL Leukemia with Distinct Patterns of Cytopenias. *Blood*.
- 615 [https://ashpublications.org/blood/article/doi/10.1182/blood.2020005831/475646/Frequent-](https://ashpublications.org/blood/article/doi/10.1182/blood.2020005831/475646/Frequent-Somatic-TET2-Mutations-in-Chronic-NK-LGL)
- 616 [Somatic-TET2-Mutations-in-Chronic-NK-LGL](https://ashpublications.org/blood/article/doi/10.1182/blood.2020005831/475646/Frequent-Somatic-TET2-Mutations-in-Chronic-NK-LGL).
- 617 Osińska I, Popko K, Demkow U. 2014. Perforin: an important player in immune response. *Cent*
- 618 *J Immunol* **39**: 109–15. <http://www.ncbi.nlm.nih.gov/pubmed/26155110>.
- 619 Shelton JF, Shastri AJ, Ye C, Weldon CH, Filshtein-Sonmez T, Coker D, Symons A, Esparza-
- 620 Gordillo J, 23andMe COVID-19 Team, Aslibekyan S, et al. 2021. Trans-ancestry analysis
- 621 reveals genetic and nongenetic associations with COVID-19 susceptibility and severity.
- 622 *Nat Genet* **53**: 801–808. <http://www.ncbi.nlm.nih.gov/pubmed/33888907>.
- 623 Shi L, Kraut RP, Aebersold R, Greenberg AH. 1992. A natural killer cell granule protein that
- 624 induces DNA fragmentation and apoptosis. *J Exp Med* **175**: 553–66.
- 625 <http://www.ncbi.nlm.nih.gov/pubmed/1732416>.
- 626 Shugay M, Bagaev D V, Zvyagin I V, Vroomans RM, Crawford JC, Dolton G, Komech EA,
- 627 Sycheva AL, Koneva AE, Egorov ES, et al. 2018. VDJdb: a curated database of T-cell
- 628 receptor sequences with known antigen specificity. *Nucleic Acids Res* **46**: D419–D427.
- 629 <http://www.ncbi.nlm.nih.gov/pubmed/28977646>.

- 630 Spitzer MH, Nolan GP. 2016. Mass Cytometry: Single Cells, Many Features. *Cell* **165**: 780–91.
- 631 <http://www.ncbi.nlm.nih.gov/pubmed/27153492>.
- 632 Stuart T, Butler A, Hoffman P, Hafemeister C, Papalexi E, Mauck WM, Hao Y, Stoeckius M,
- 633 Smibert P, Satija R. 2019. Comprehensive Integration of Single-Cell Data. *Cell* **177**: 1888-
- 634 1902.e21. <https://linkinghub.elsevier.com/retrieve/pii/S0092867419305598>.
- 635 Stubbington MJT, Rozenblatt-Rosen O, Regev A, Teichmann SA. 2017. Single-cell
- 636 transcriptomics to explore the immune system in health and disease. *Science* **358**: 58–63.
- 637 <http://www.ncbi.nlm.nih.gov/pubmed/28983043>.
- 638 Sze S, Pan D, Nevill CR, Gray LJ, Martin CA, Nazareth J, Minhas JS, Dival P, Khunti K,
- 639 Abrams KR, et al. 2020. Ethnicity and clinical outcomes in COVID-19: A systematic
- 640 review and meta-analysis. *EClinicalMedicine* **29**: 100630.
- 641 <http://www.ncbi.nlm.nih.gov/pubmed/33200120>.
- 642 Tian Y, Grifoni A, Sette A, Weiskopf D. 2019. Human T Cell Response to Dengue Virus
- 643 Infection. *Front Immunol* **10**: 2125. <http://www.ncbi.nlm.nih.gov/pubmed/31552052>.
- 644 Verhoeckx K, Cotter P, López-Expósito I, Kleiveland C, Lea T, Mackie A, Requena T,
- 645 Swiatecka D, Wichers H, eds. 2015. *The Impact of Food Bioactives on Health*. Springer
- 646 International Publishing, Cham <http://link.springer.com/10.1007/978-3-319-16104-4>.

- 647 Vivier E, Tomasello E, Baratin M, Walzer T, Ugolini S. 2008. Functions of natural killer cells.
- 648 *Nat Immunol* **9**: 503–510. <http://www.nature.com/articles/ni1582>.
- 649 Weese D, Holtgrewe M, Reinert K. 2012. RazerS 3: faster, fully sensitive read mapping.
- 650 *Bioinformatics* **28**: 2592–9. <http://www.ncbi.nlm.nih.gov/pubmed/22923295>.
- 651 Zhang J-Y, Wang X-M, Xing X, Xu Z, Zhang C, Song J-W, Fan X, Xia P, Fu J-L, Wang S-Y,
- 652 et al. 2020. Single-cell landscape of immunological responses in patients with COVID-19.
- 653 *Nat Immunol* **21**: 1107–1118. <http://www.ncbi.nlm.nih.gov/pubmed/32788748>.
- 654
- 655

656 FIGURES

**A** Scheme of the current study

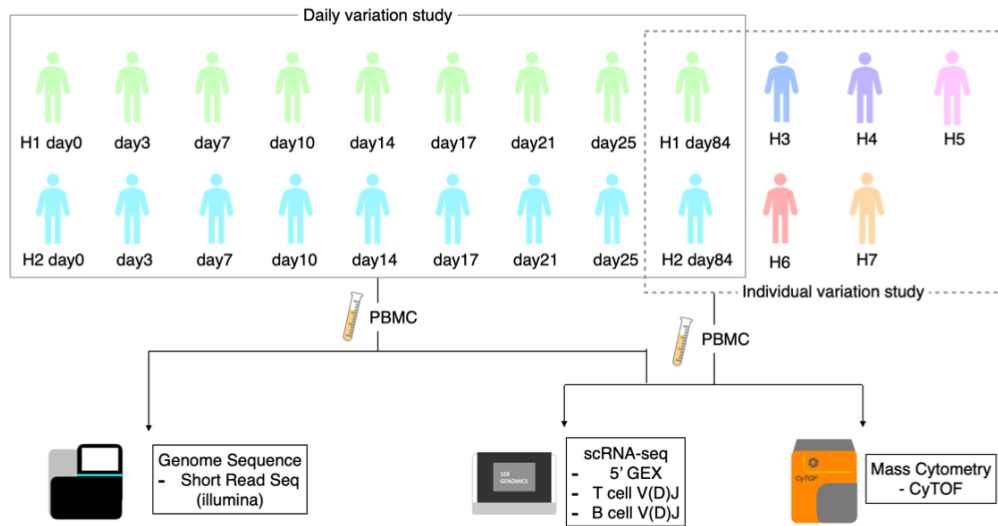

| ID | Age | Sex | Ethnicity | Medical history        |
|----|-----|-----|-----------|------------------------|
| H1 | 49  | M   | Japan     |                        |
| H2 | 43  | F   | Japan     |                        |
| H3 | 38  | M   | Indonesia | Dengue virus infection |
| H4 | 31  | M   | Thailand  |                        |
| H5 | 47  | F   | Japan     | Asthma                 |
| H6 | 52  | F   | Japan     |                        |
| H7 | 69  | M   | Japan     | B cell lymphoma        |

657

658



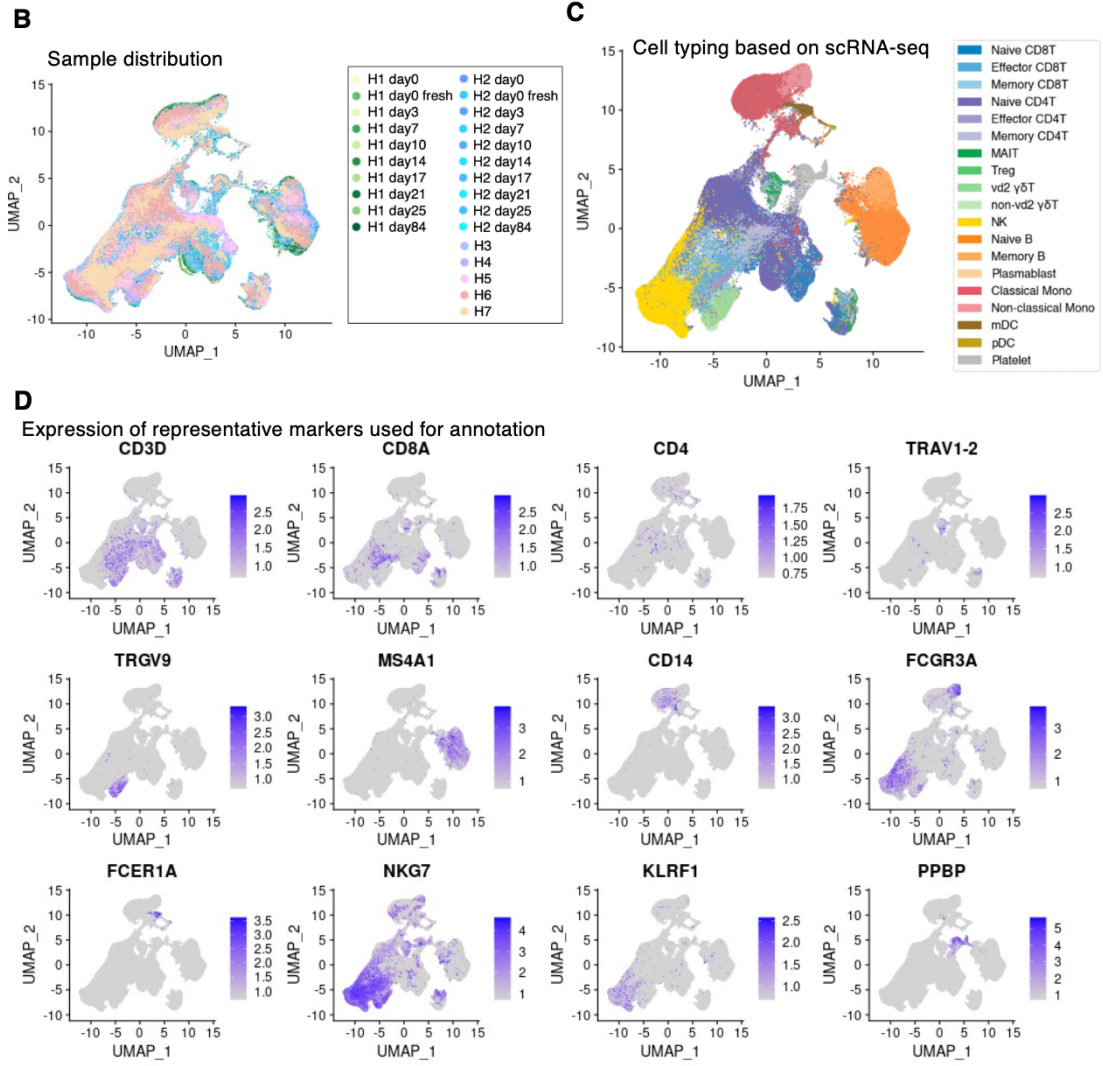

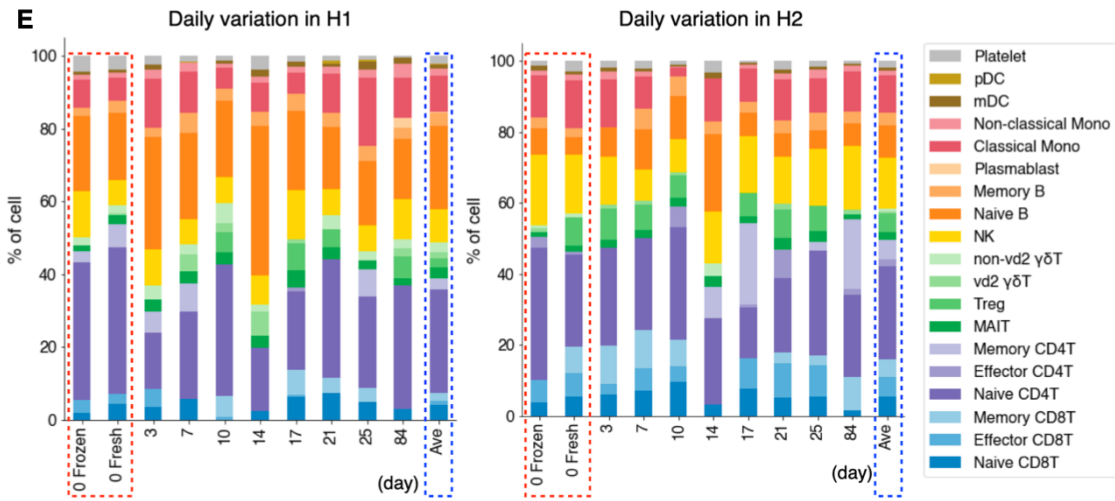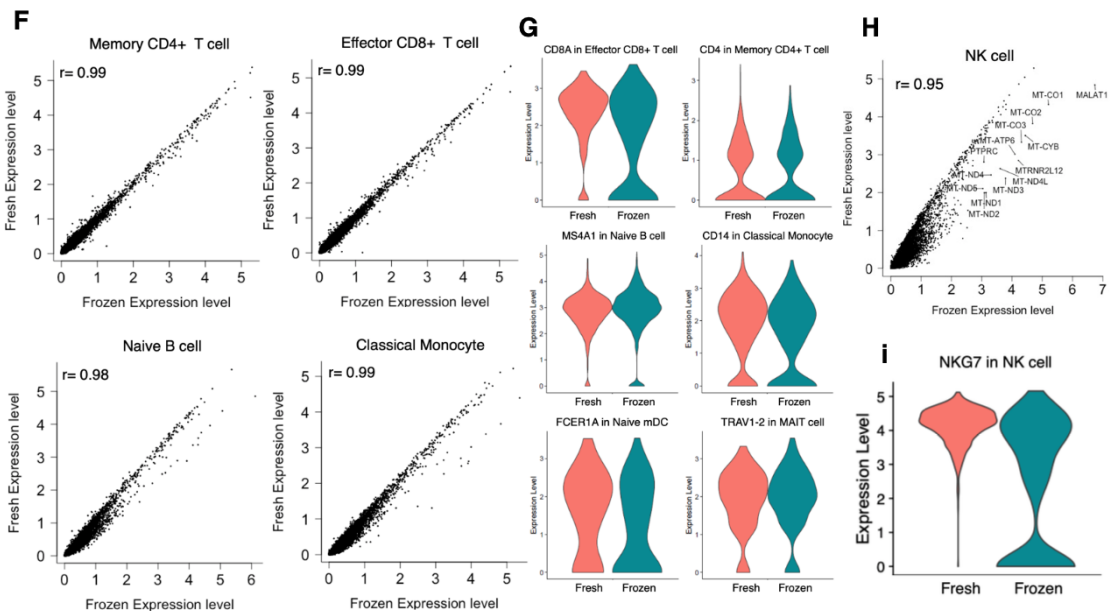

661 **Figure 1. Characterization and evaluation of the scRNA-seq datasets**

662 (A) Scheme and sample list of the present study. For the daily variation study, the multiple  
663 time-point samples were collected from H1 and H2 at the shown time-points. For the intra-  
664 individual variation study, PBMC samples were collected from seven participants, H1- H7. As  
665 illustrated the collected samples were subjected to the transcriptome, genomes, and proteome  
666 analyses (top). The medical history information about donors are shown in the table (bottom).  
667 (B) Evaluation of the sample distribution. We used the UMAP plot to confirm the existence of  
668 the batch effect. Each point shows a cell and is colored with 25 cases shown in the margin. (C)  
669 Cell type annotation. UMAP plot showing clusters colored by cell types. (D) Expression of  
670 representative markers for cell annotation. We used the following markers: CD3D, CD8A, and  
671 CD4 (T cell), TRAV1-2 (MAIT cell), TRGV9 ( $\gamma\delta$  T cell), MS4A1 (B cell), CD14 and FCGR3A  
672 (monocyte), NKG7, and KLRF1 (NK cell), PPBP (platelet). (E) Structure of PBMC at each  
673 time point of H1 (left) and H2 (right). The *x-axis* shows the day after first sampling, and the *y-*  
674 *axis* shows the percentage of each cell component. Bars with red dotted line show the data  
675 comparison of a fresh and frozen sample, and blue dotted line shows the average of each person.  
676 (F) Evaluation of the correlation between the fresh and frozen samples. We used H1 Day 0 fresh  
677 and H1 Day 0 frozen. The *x-axis* shows the expression level of the frozen sample, and the *y-axis*  
678 shows the expression level of the fresh sample. Correlation is shown in each plot. (G)

679 Expression of indicated genes in each cell type of fresh and frozen samples. **(H)** Correlation of  
680 the gene expressions between the fresh and frozen NK cells. Mitochondrial genes are  
681 highlighted in the panel. Outlier genes are also shown in the plot. **i**, Expression levels of the  
682 NKG7 gene in fresh and frozen NK cells.

683

684

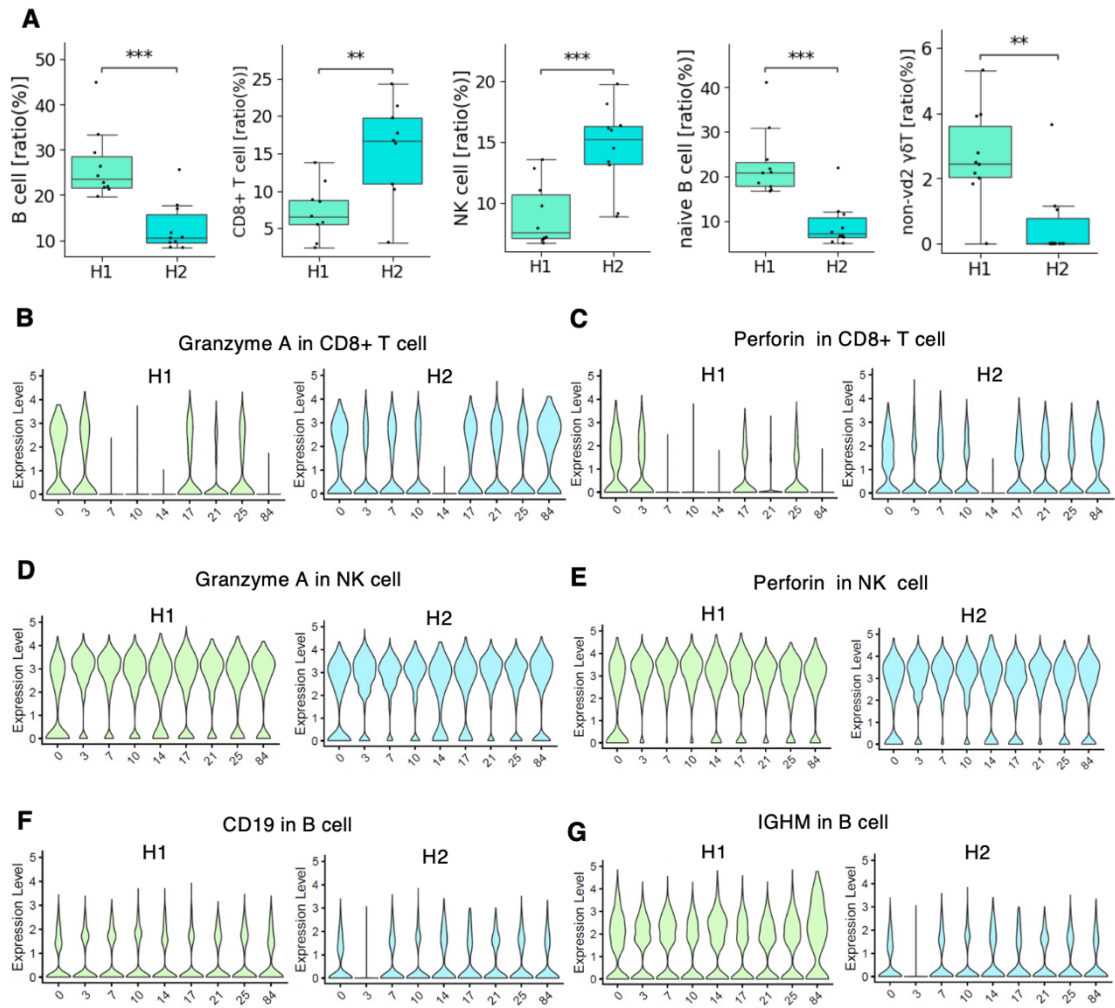

685

686

687 **Figure 2. Daily diversity of PBMC profiling in H1 and H2**

688 **(A)** Ratio of each cell type in H1 (pale green) and H2 (light blue). Boxplots include eight  
689 timepoints of each person of B cell, CD8<sup>+</sup> T cell, NK cell, naïve B cell, non-vd2 gd T cell (left  
690 to right). p-value was calculated by t-test and shown as \*\*: 1.00e-03 < p <= 1.00e-02, \*\*\*:  
691 1.00e-04 < p <= 1.00e-03. **(B- G)** Expression level of representative genes in each cell type of  
692 H1 and H2; granzyme A expression of CD8<sup>+</sup> T cell **(B)**, perforin expression of CD8<sup>+</sup> T cell **(C)**,  
693 granzyme A expression of NK cell **(D)**, perforin expression of NK cell **(E)**, CD19 expression of  
694 B cell **(F)**, and IGMH expression of B cell **(G)** in H1 and H2.

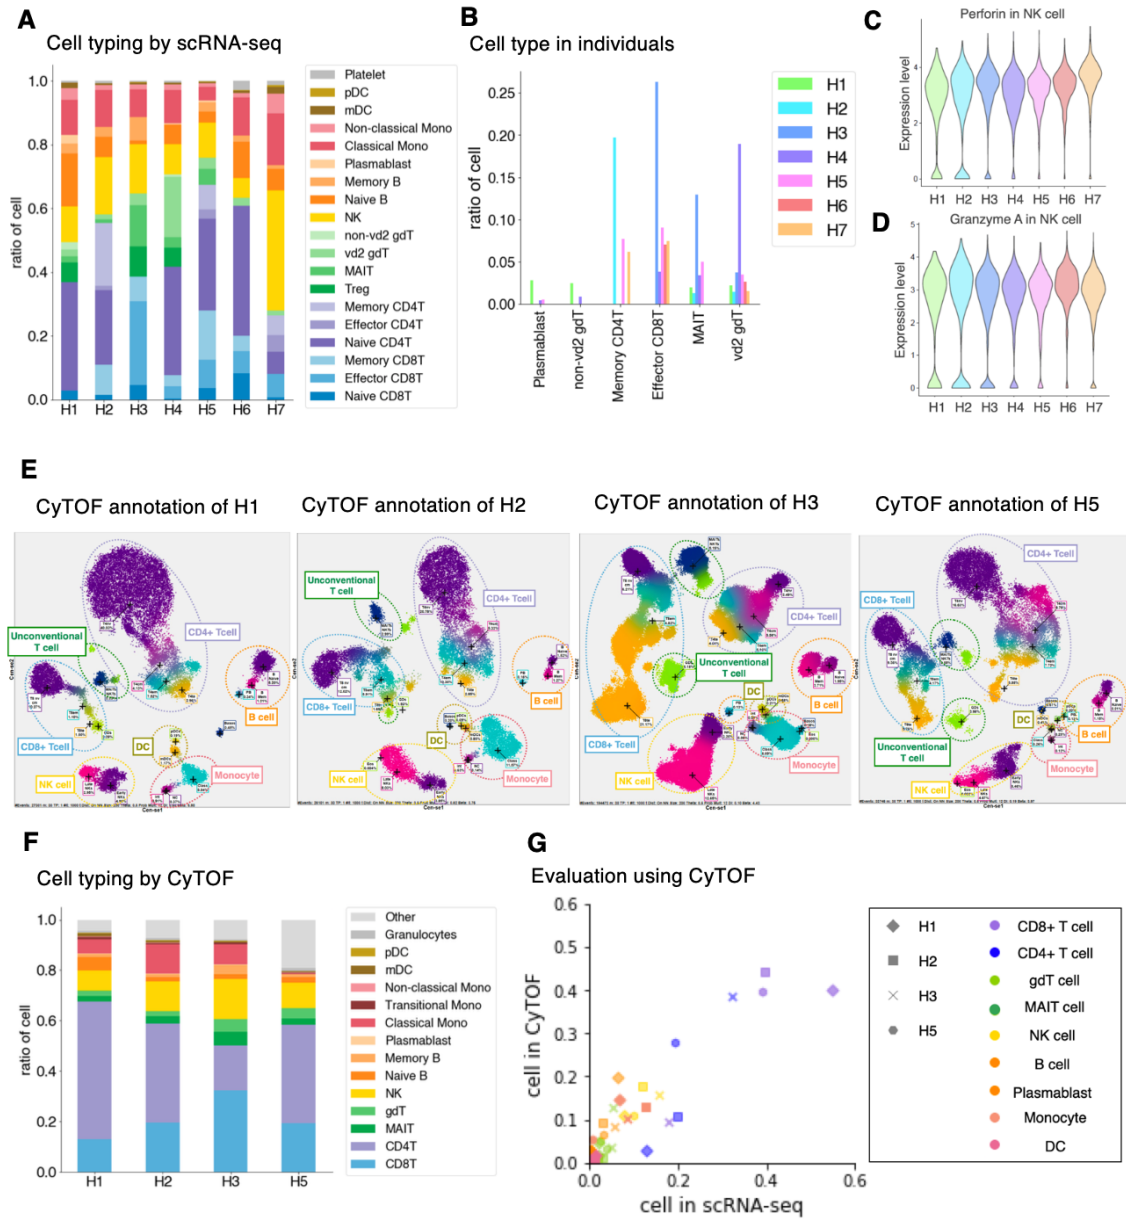

695

696

697 **Figure 3. Diversity of PBMC profiling in seven individuals**

698 **(A)** Structure of PBMC in seven individuals. Cells are annotated based on the gene expressions  
699 in the dataset analyzed by scRNA-seq. The *x-axis* shows the individuals, and the *y-axis* shows  
700 the ratio of each cell component. Color legends are shown in the margin. **(B)** Individual  
701 variance of cell types. The *x-axis* shows the focusing cell type, and the *y-axis* shows the ratio of  
702 cells in individuals. **(C and D)** Gene expression level in seven individuals. Gene and cell type  
703 of interest are shown at the top of the graph. **(E)** Cell typing using CyTOF of H1, H2, H3, and  
704 H5 (from left to right). **(F)** Structure of PBMC based on CyTOF. The *x-axis* shows the  
705 individuals, and the *y-axis* shows the ratio of each cell type. Color annotations are shown in the  
706 margin. **(G)** Evaluation analysis using CyTOF. Scatterplot showing the correlation of the ratio  
707 of cells annotated by scRNA-seq (*x-axis*) and by CyTOF (*y-axis*). Markers are shaped  
708 depending on each individual and colored by cell types shown in the margin. For H1 and H2  
709 used in Figure 3, we selected final time-point as representative samples.

710

711



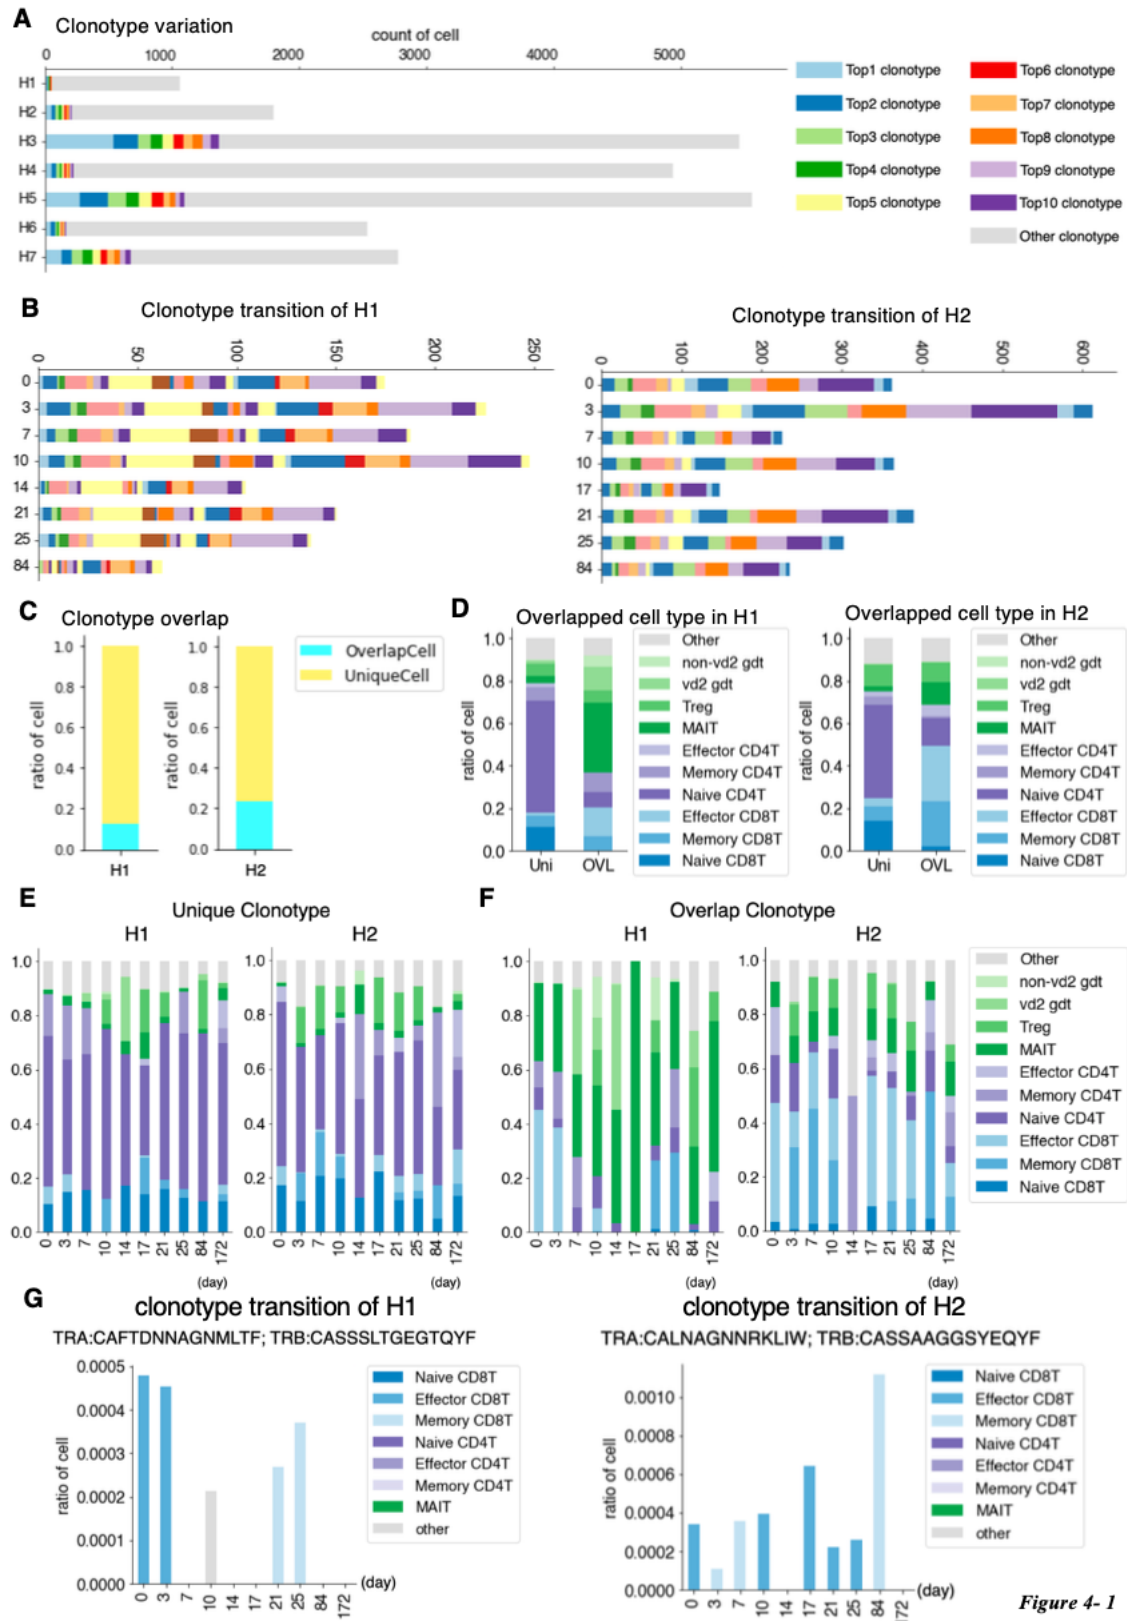

Figure 4- 1

712

713

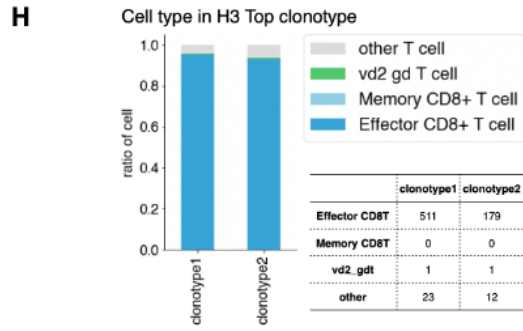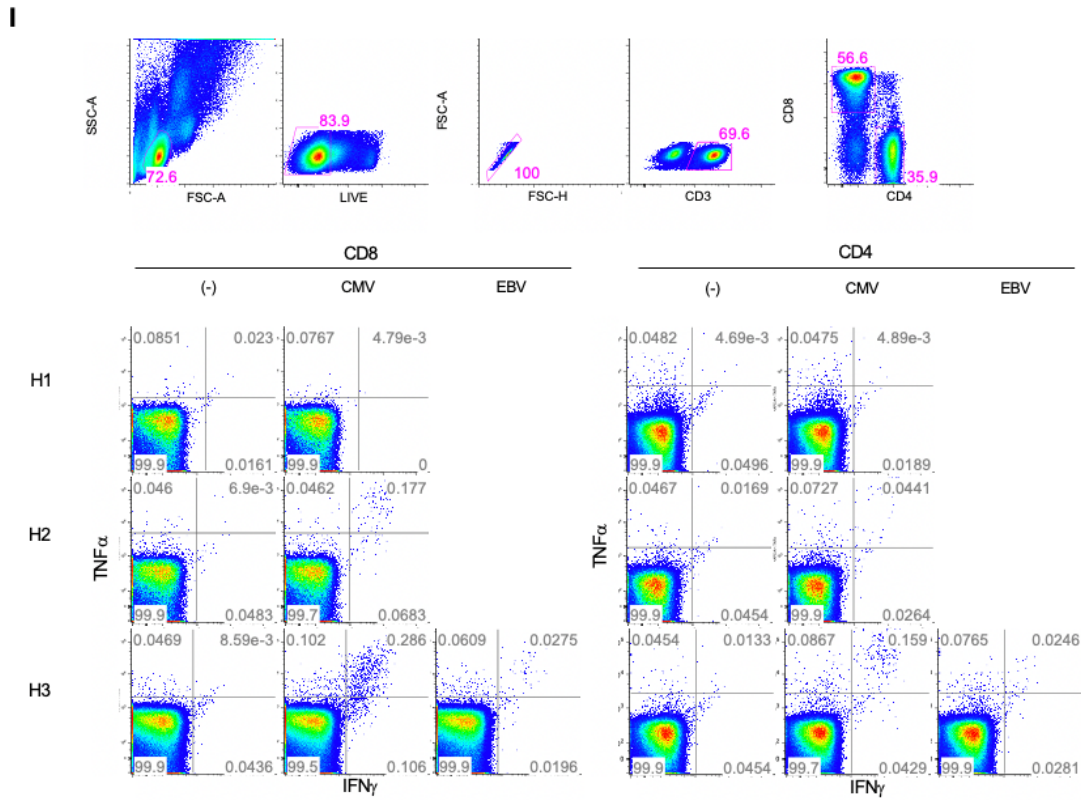

715 **Figure 4. TCR individual and daily variation**

716 (A) Clonotype divergence between seven individuals. The *x-axis* shows the number of T cells  
717 and the *y-axis* shows the individual. Cell with top 1- top 10 clonotypes are plotted as specific  
718 colors shown in margins. Top clonotypes shown are not common between individuals. (B)  
719 Clonotype divergence of nine timepoints of H1 (left) and H2 (right). Barplot shows clonotypes  
720 ranked as top 1- top 10 at any point in time. Note that color in H1 and H2 is not common. c,  
721 Barplot showing the ratio of T cells with unique TCR (light blue) and overlapped TCR (yellow)  
722 in H1 (left) and H2 (right). (D) Barplot showing the ratio of the detailed T cell type in unique  
723 (Uni) and overlapped (OVL) of H1 average (left) and H2 average (right). (E and F), Barplot  
724 showing ratio of detailed T cell type in unique (E) and overlapped (F) of H1 (left) and H2 nine  
725 time points (right). (G) Barplot showing the ratio of T cells at each time point with specific  
726 clonotype TCR of H1 (left) and H2 (right). Information about the TCR is shown at the top of  
727 each graph. (H) Cell lineage of H3 top1 and top2 clonotype. (I) ICS analysis. top panel: cell  
728 type separation is shown for H3 as a representative (top); ICS analysis using H1 (top), H2  
729 (middle) and H3 (bottom) under no stimulation as control (left) and peptide stimulation of CMV  
730 (middle), EBV (right) in CD8<sup>+</sup> T cell (right) and CD4<sup>+</sup> T cell (left).

731

732

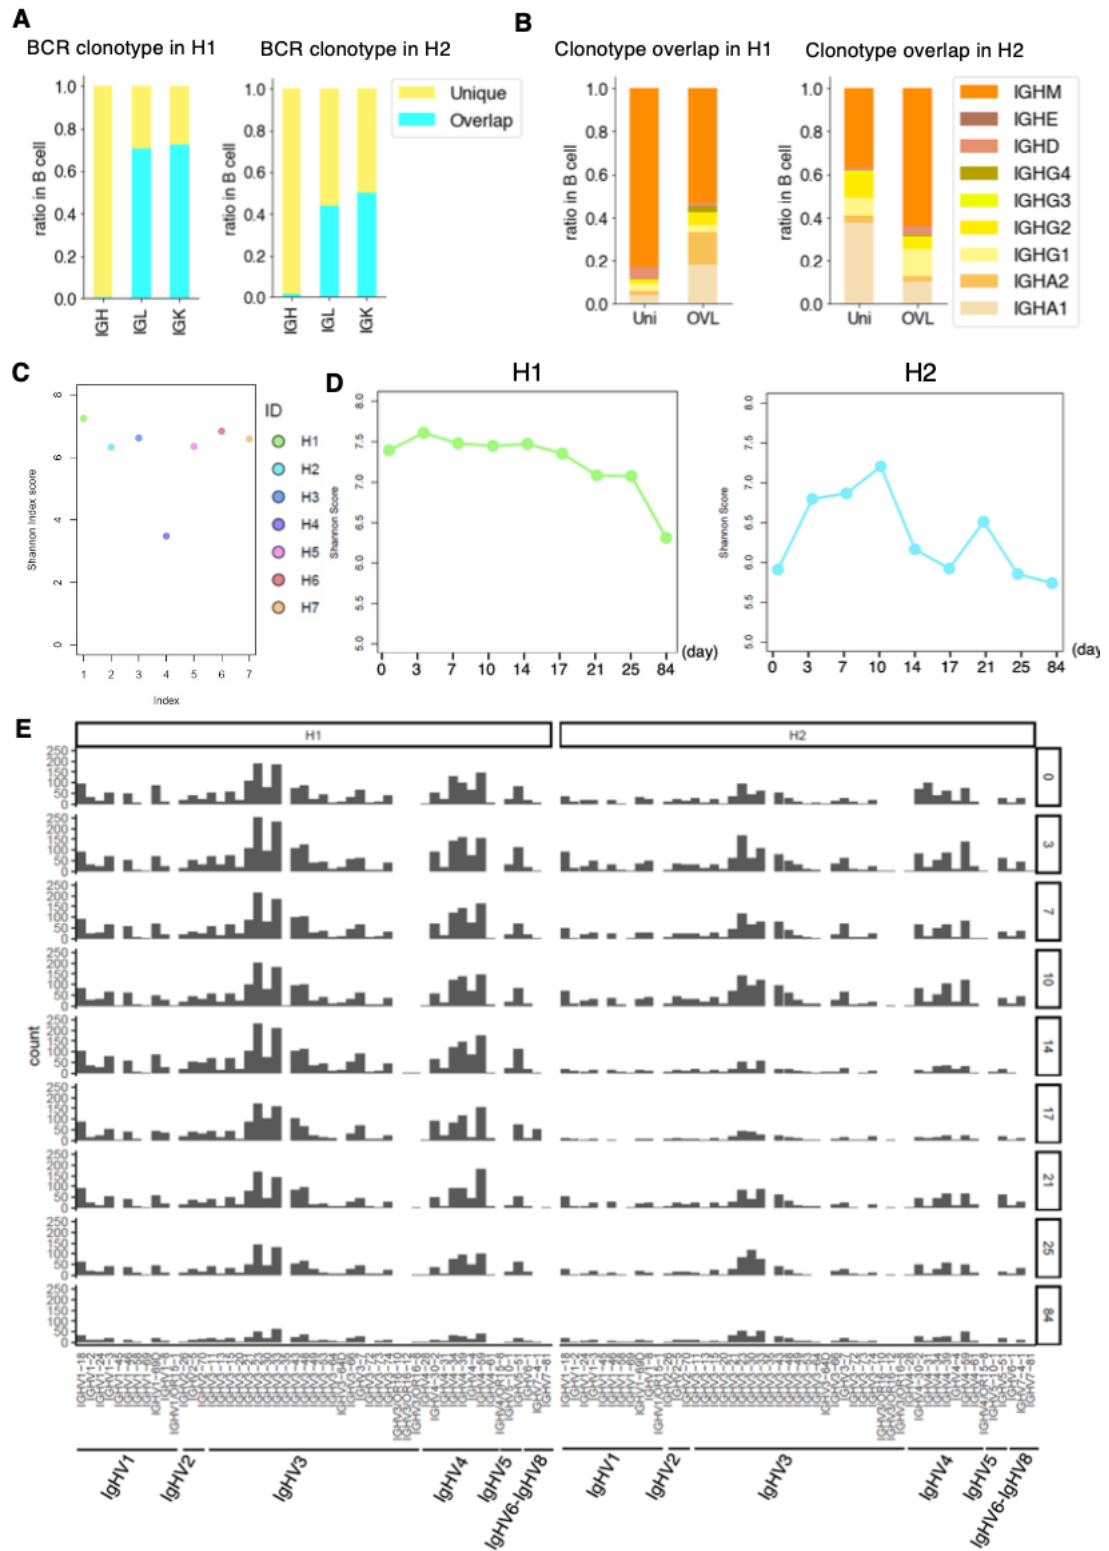

Figure 5

733

734

735 **Figure 5. Individual variation and Daily variation of BCR**

736 **(A)** BCR clonotype divergence in H1 (left) and H2 (right). Barplot showing the ratio of  
737 overlapped (paleblue) and unique (light yellow) clonotype of IgH, IgL, and IgK. **(B)** Ratio of  
738 each clonotype of unique(left) and overlap(right) in H1 and H2. **(C)** Shannon index score  
739 variation of BCR in H1- H7. Color legend is shown in the margin. For H1 and H2, we used the  
740 average score of Day 0 to Day 84. **(D)** Daily variation of Shannon index score of BCR daily  
741 variation in H1 (left) and H2 (right). The *x-axis* shows the time point, and the *y-axis* shows  
742 Shannon's score. **(E)** Variation of V gene in BCR from Day 0 to Day 84 (top to bottom) in H1  
743 (left) and H2 (right).

744

745

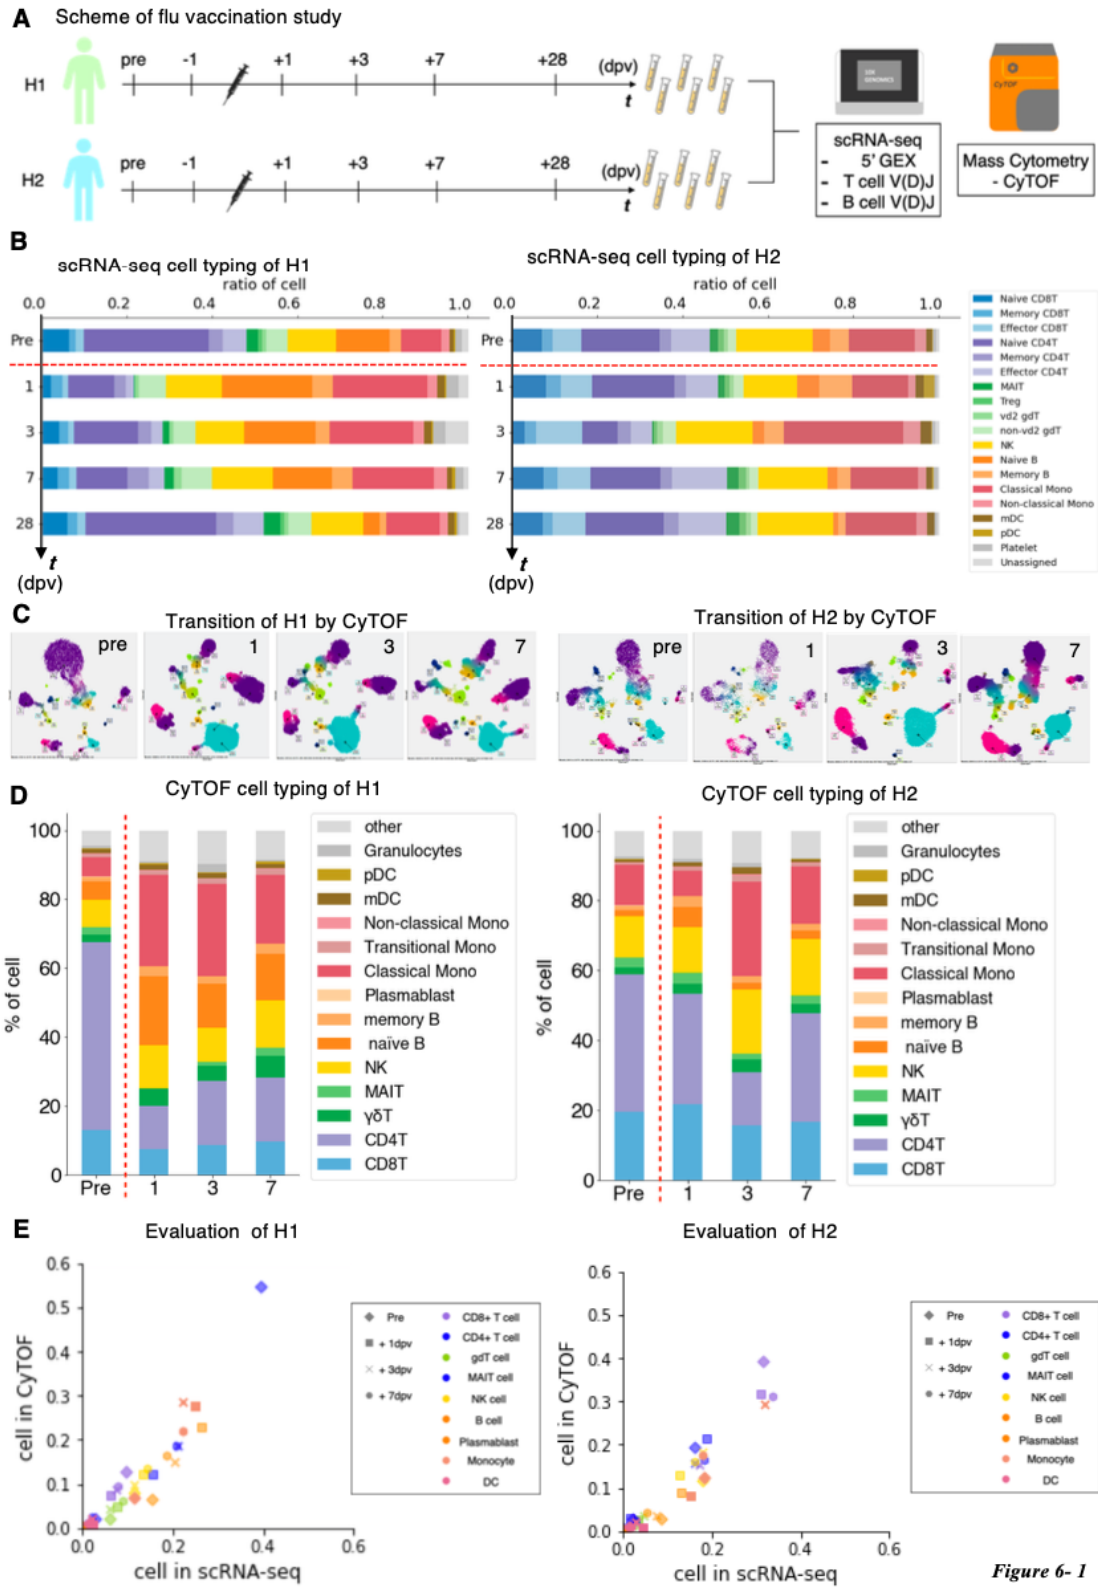

Figure 6- 1

746  
747  
748

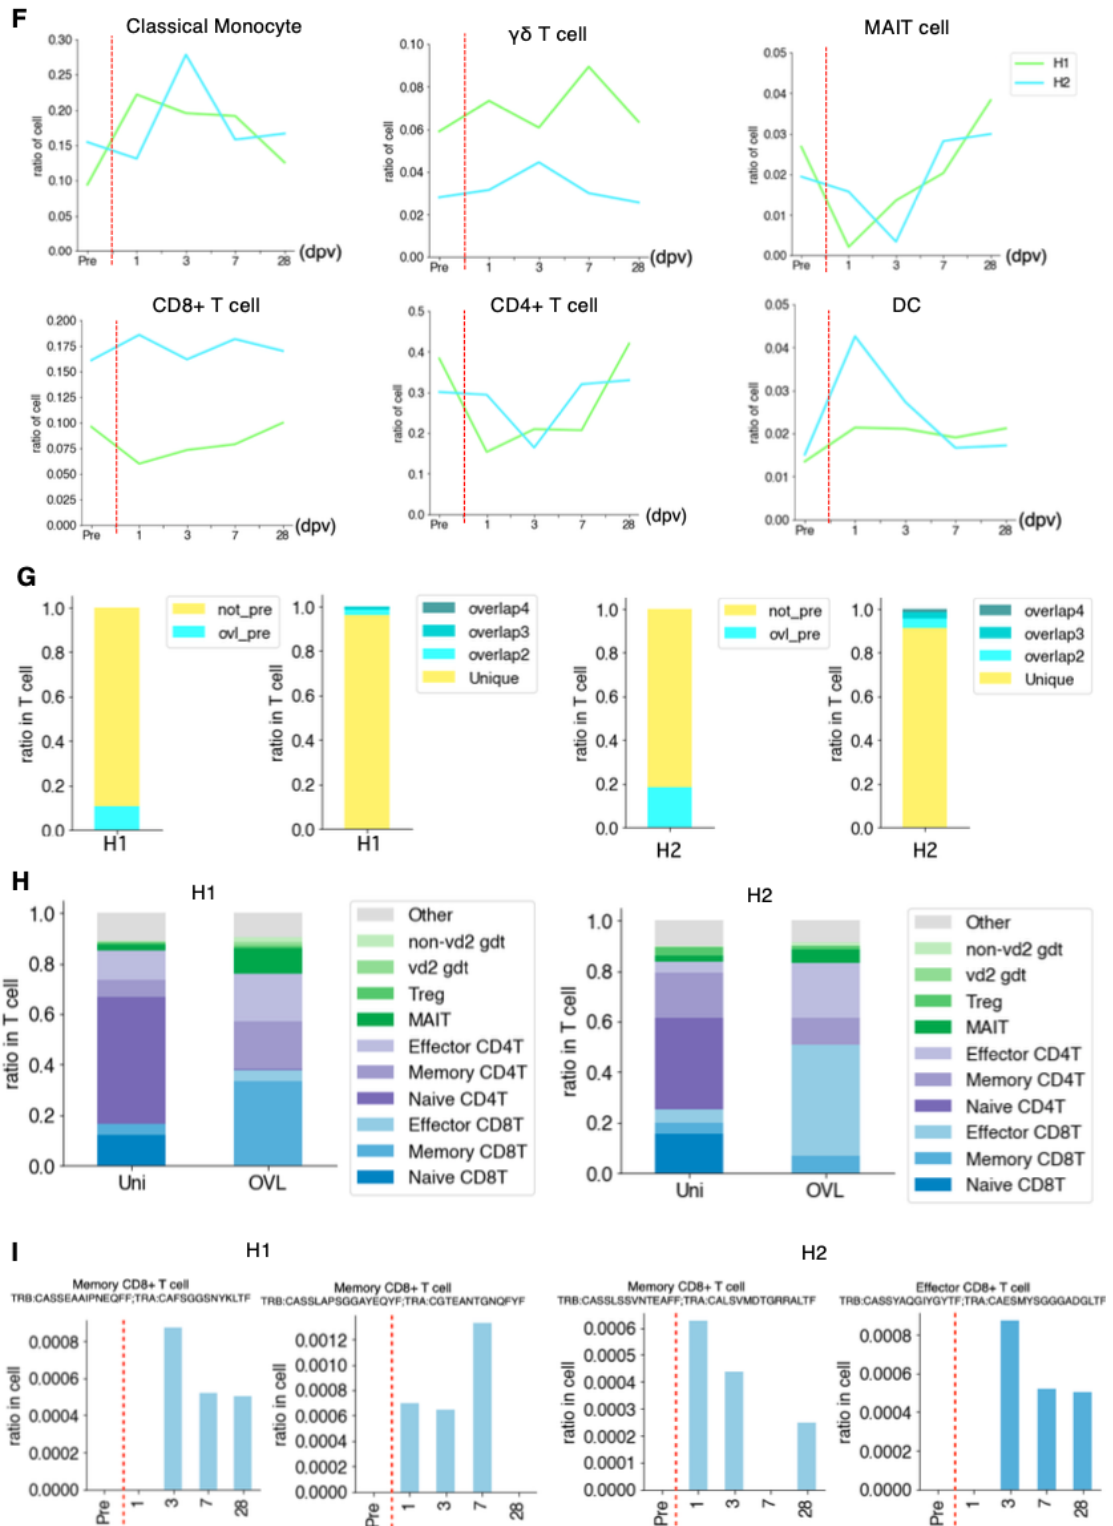

Figure 6-2

749

750

751

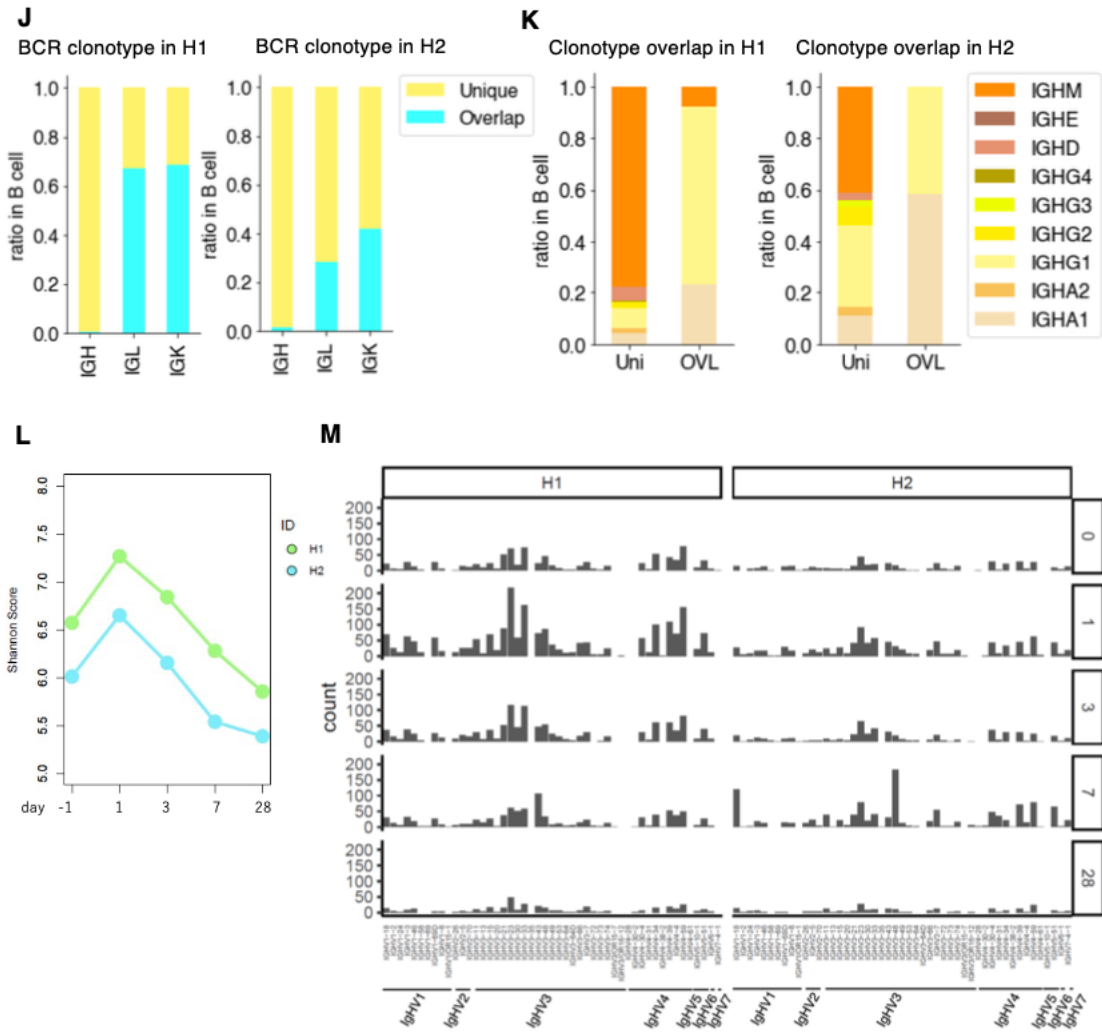

752

753



754 **Figure 6. Perturbation of the immune cell gene expression profiles depending on influenza**

755 **vaccination**

756 **(A)** Influenza vaccination study scheme. We collected blood samples from H1 and H2 one day

757 before vaccination (-1 dpv, day post vaccination), 1, 3, 7, and 28 dpv. We analyzed PBMCs

758 transcriptome, V(D)J of BCR and TCR in single-cell level using 10x Genomics, and mass

759 cytometry in single-cell level using Fluidigm CyTOF. **(B)** Barplot showing the transition of cell

760 components before and after influenza vaccination of H1 (left) and H2 (right) analyzed by

761 scRNA-seq. **c**, Cen's plot showing the transition of cell components analyzed by CyTOF of H1

762 (left) and H2 (right) in pre, 1, 3, 7 dpv. **(D)** Barplot showing the transition of cell components

763 analyzed by CyTOF of H1 (left) and H2 (right) in pre, 1, 3, 7 dpv. Color annotations are shown

764 in the margin. **(E)** Scatterplot showing the correlation of the ratio of cells annotated by scRNA-

765 seq (*x-axis*) and by CyTOF (*y-axis*). Markers are shaped depending on timepoint and colored by

766 the cell types shown in margin. **(F)** Transition of the ratio of cell type shown in lineplot. The *x-*

767 *axis* shows day post vaccination and the *y-axis* shows ratio of cell in each person. **(G)** Barplot

768 showing the ratio of T cells with unique TCR (light blue) and overlapped TCR (yellow) in H1

769 (left) and H2 (right). Clonotype exit in pre-vaccination is annotated as "ovl pre" and in only

770 after vaccination annotated as "not pre". Clonotype of "not pre" further grouped into Unique,

771 only exit at one timepoint, and overlap (ovl). Number after ovl shows number of appearance.

772 (H) Barplot showing the ratio of the detailed T cell type in unique and overlapped of H1  
773 average (left) and H2 average (right). (I) Barplot showing the ratio of T cells with specific  
774 clonotype TCR of H1(left) and H2 (right) in each time point. The *x-axis* shows day post  
775 vaccination, and the *y-axis* shows the ratio of specific T cells. Information about the TCR  
776 clonotype is shown at the top of each graph. (J) BCR Clonotype divergence in H1. Barplot  
777 showing the ratio of overlapped (pale blue) and unique (light yellow) clonotype of IgH, IgL, and  
778 IgK. (K) Ratio of each clonotype of unique(left) and overlap(right) in H1 and H2. (L) Shannon  
779 index of H1 and H2 BCR. (M) Diversity of the gene in BCR from - 1 dpv to 28 dpv (top to  
780 bottom) in H1 (left) and H2 (right).

781

782

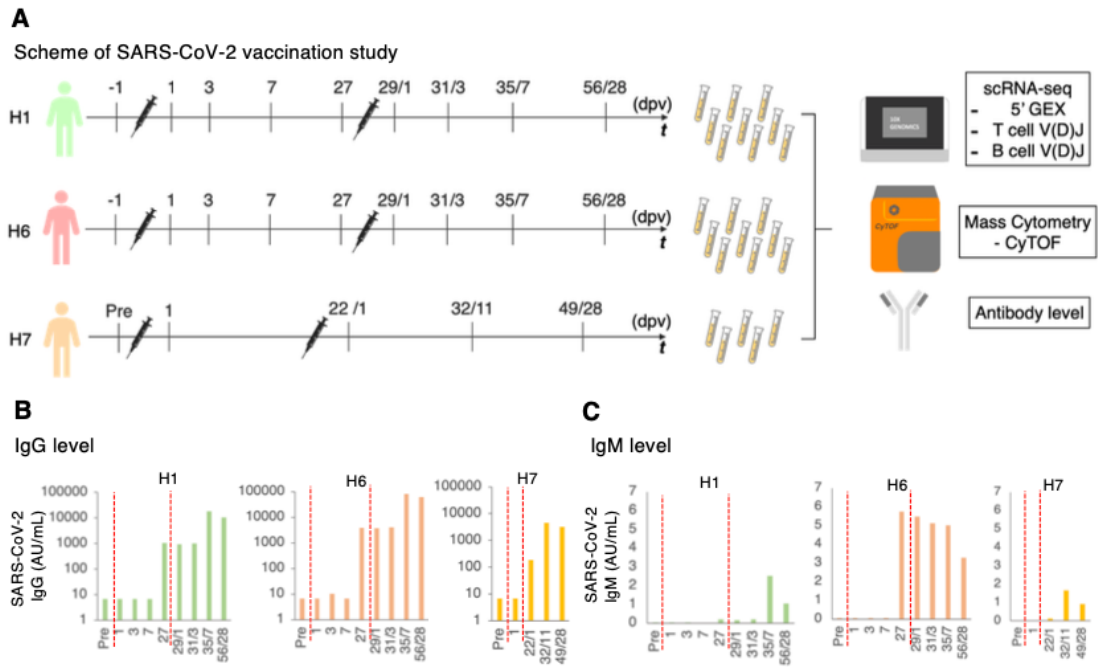

783

784

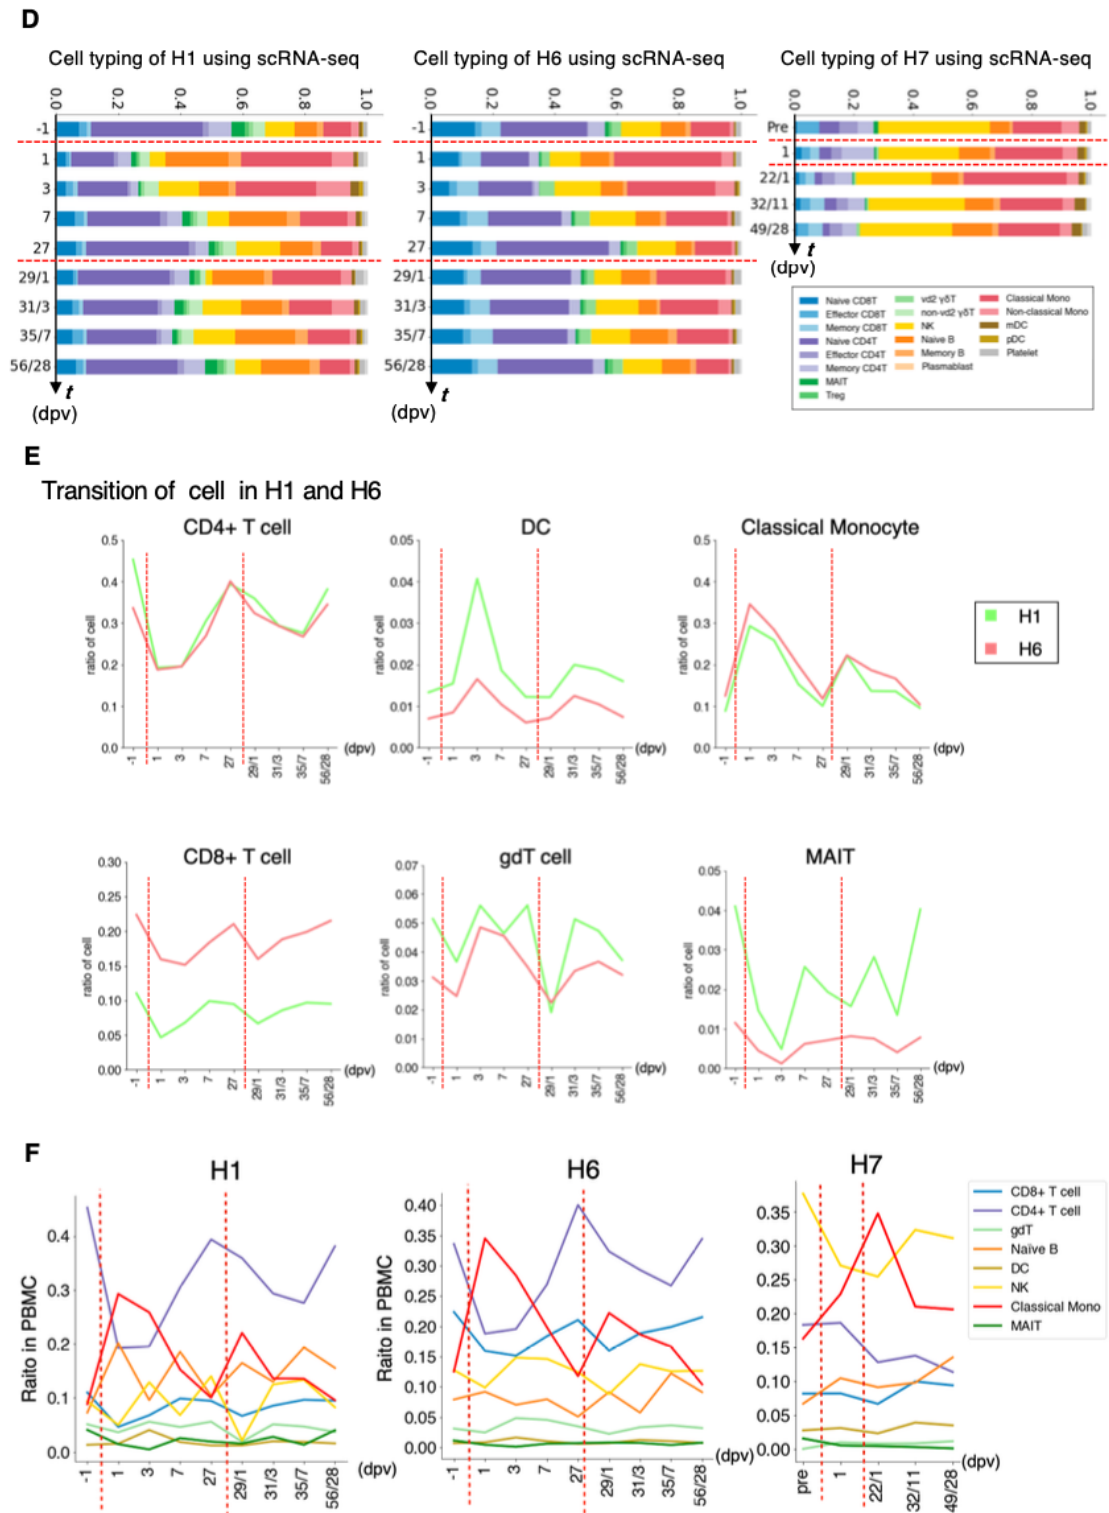

785

786

787

Figure 7- 2

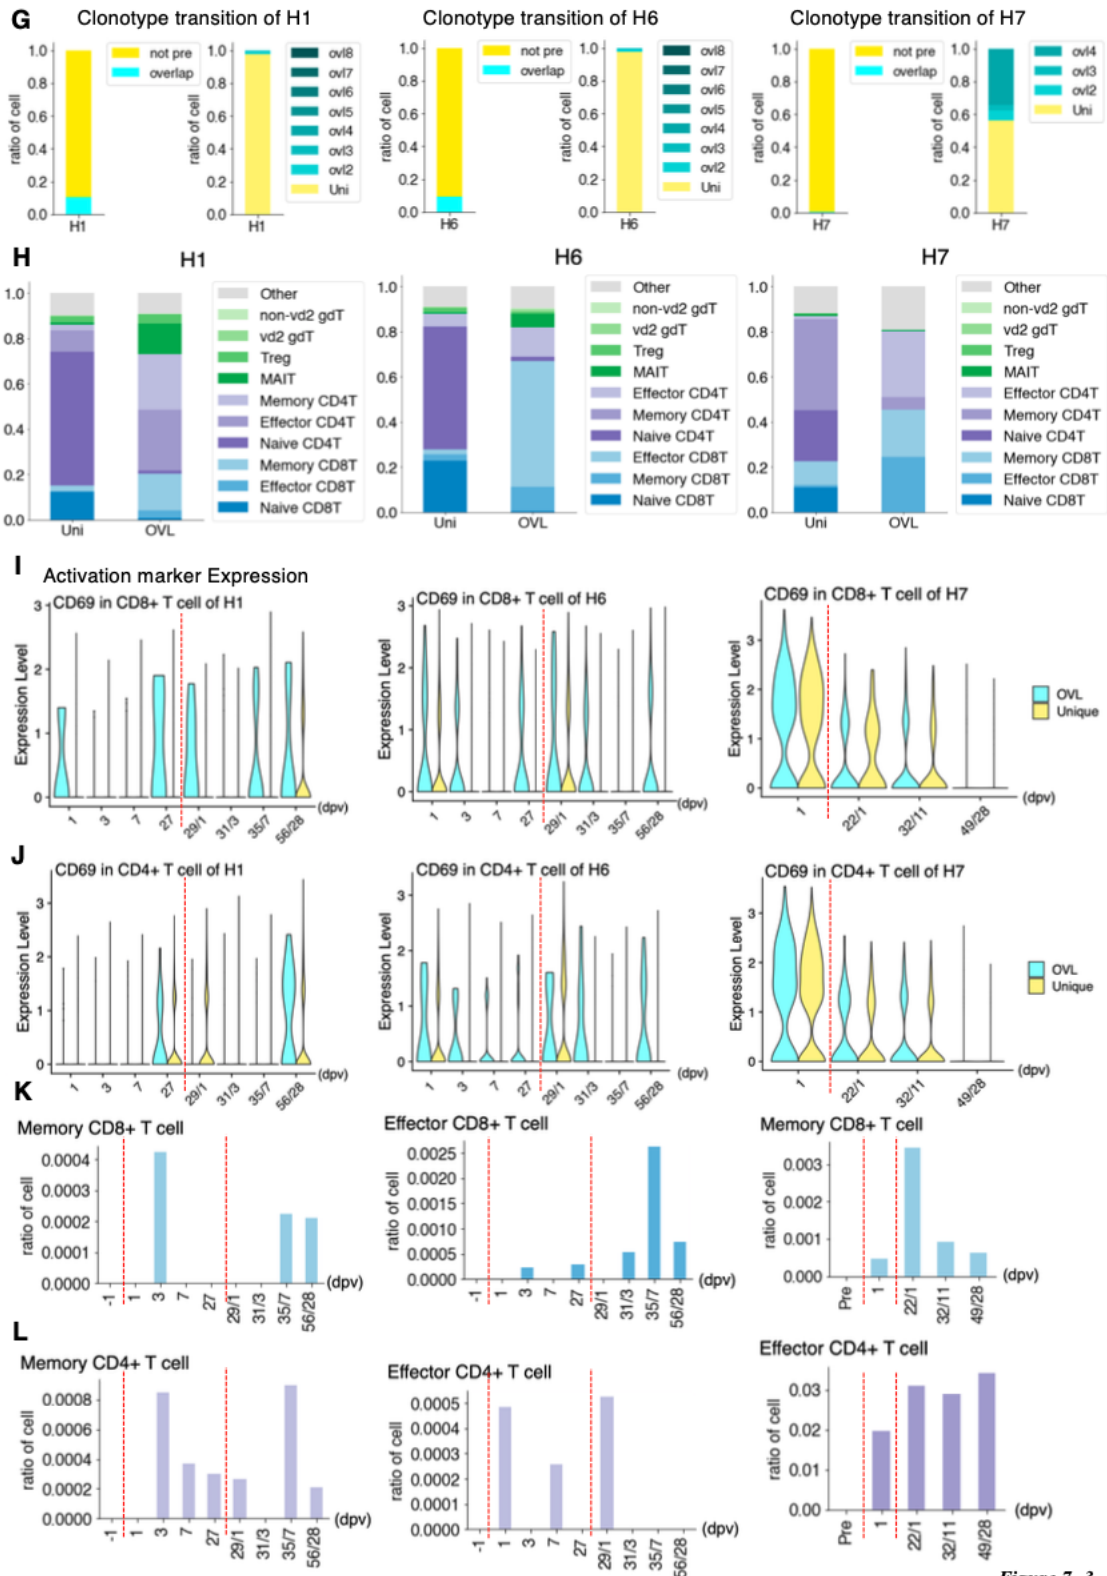

Figure 7- 3

788

789

790 **Figure 7. Perturbation of the immune cell gene expression profiles depending on SARS-**  
791 **CoV-2 vaccination**

792 **(A)** SARS-CoV-2 vaccination study scheme. Blood samples of H1, H6, and H7 were collected  
793 before the vaccination (one day before vaccination, -1 dpv), post-first vaccination, and post-  
794 second vaccination. We analyzed PBMCs transcriptome, V(D)J of BCR and TCR at the single-  
795 cell level using 10x Genomics, proteomics in single-cell level using Fluidigm CyTOF and anti-  
796 SARS-CoV-2 virus antibody level. **(B and C)** Transition of anti-SARS-CoV-2 antibody levels.  
797 Barplot shows antibody level at each time point. The *x-axis* shows the day after the first  
798 vaccination, and the *y-axis* shows the level of IgG (AU/mL) **(B)** and IgM (AU/mL) **(C)** in H1  
799 (green, left), H2 (coral, middle) and H7 (orange, right). **(D)**, Barplot shows the transition of cell  
800 components before and after SARS-CoV-2 vaccination based on scRNA-seq datasets of H1  
801 (left), H6 (middle), and H7 (right). **(E and F)** Transition of cell type population before and after  
802 SARS-CoV-2 vaccination in H1 and H6 **(E)** and H1, H6 and H7 **(F)**. **(G)** Transition of T cell  
803 with unique clonotypes and overlapped clonotypes of H1 (left), H6 (middle) and H7 (right).  
804 Clonotypes exit in pre-vaccination is annotated as “overlap” and in only after vaccination  
805 annotated as “not pre”. Clonotypes of “not pre” were further grouped into Unique, as the ones  
806 which only existed at one timepoint, and the ones which overlapped (ovl). Number after “ovl”  
807 represents the order of the appearance. **(H)**, Barplot shows T cell component transitions of H1

808 (left), H6 (middle) and H7 (right). **(I and J)** Expression level of the activation marker of T cell  
809 with a unique clonotype and overlapped clonotypes in CD8<sup>+</sup> T cell **(I)** and CD4<sup>+</sup> T cell **(J)**. The  
810 *x-axis* shows the day after the first vaccination, and the *y-axis* shows the CD69 gene expression.  
811 **(K and L)** Barplot showing the ratio of T cells with specific TCR in SARS-CoV-2 vaccination  
812 in H1 (left), H6 (middle), and H7 (right). The *x-axis* shows the day post-vaccination, and the *y-*  
813 *axis* shows the ratio of the specific T cells. Information about the TCR clonotype is shown at the  
814 top of each graph.  
815

816 **Additional files**

817 Supplemental information includes three figures (separate file) and eleven tables (separate  
818 file).

819 **Table S1 (separate file) Datasets used in the current study**

820 This table provides the list of all samples and methods used for analyses in this study.

821 **Table S2 (separate file) Sequence Statistics of scRNA-seq used in the daily and individual  
822 variance**

823 This table provides the sequence statistics of scRNA-seq 5'GEX for daily variance, individual  
824 variance, influenza vaccination and SARS-CoV-2 vaccination study.

825 **Table S3 (separate file) Percentage of simple cell type analyzed by scRNA-seq**

826 This table provides the percentage of the simple cell type for each sample.

827 **Table S4 (separate file) Percentage of detailed cell type analyzed by scRNA-seq**

828 This table provides the percentage of the simple cell type for each sample.

829 **Table S5 (separate file) List of genes with low-correlation value in fresh and frozen  
830 comparison**

831 This table shows the correlation of gene expression between fresh and frozen H1 Day 0  
832 samples.

833 **Table S6 (separate file) List of correlation value in scRNA-seq and CyTOF comparison**



834 This table shows the correlation of scRNA-seq and CyTOF in the indicated cell types.

835 **Table S7 (separate file) Sequence statistics scVDJ-seq used in the current study**

836 This table provides the sequence statistics of the scRNA-seq TCR and BCR V(D)J sequencing

837 of daily variance, individual variance, influenza vaccination and SARS-CoV-2 vaccination

838 study.

839 **Table S8 (separate file) Frequency of top used Clonotypes in H1 and H2 TCR**

840 This table provides the statistics of the CDR3 sequence and the frequency of the daily variation

841 of H1 and H2 study.

842 **Table S9 (separate file) Statistics of the clonotypes and T cell recognizing CMV and EBV**

843 This table provides the information about the clonotypes and T cell recognizing CMV (A) and

844 EBV (B).

845 **Table S10. (separate file) Detected antibody level during influenza vaccination**

846 (A) This table shows the antibody level of the anti-influenza virus, type A- H1, type A- H3, type

847 B-Yamagata, and type B- Victoria, during the influenza vaccination in H1 and H2. (B) This

848 table shows the level of IgG and IgM antibody anti-SARS-CoV-2 virus in the S region during

849 the SARS-CoV-2 vaccination in H1, H6 and H7.

850 **Table S11. (separate file) Markers used in the CyTOF analysis**

851 This table provides the markers used in the CyTOF study. We used a commercial antibody set.
